# Supplementary material
Source: PubMed Central journal article supplement (PMC2689116)
Supplement: JCI37127sd.pdf [file JCI37127sd.pdf]

## Supplemental information

### Supplemental Figure legends

#### **Supplemental Figure 1. Profiles of aberrations in glioma, melanoma and lung cancer**

**(A)** Chromosomal copy number changes of NSCLC cell lines are plotted against those of primary gliomas. Two separate figures are given for deletions (left panel, NSCLC cell lines in blue, gliomas in purple) and amplifications (right panel, NSCLC cell lines in red, gliomas in purple). **(B)** Chromosomal copy number changes of NSCLC cell lines are plotted against those of primary melanomas (NSCLC cell lines in red respectively blue as above, melanoma short term cultures in purple). **(C)** Genomic similarity was analyzed by computing correlations of GISTIC q-values for each SNP between NSCLC cell lines and the indicated cancer entity primary lung cancer, ovarian cancer, glioma, melanoma cell culture samples, normal tissues and a randomly split subset of NSCLC cell lines.

#### **Supplemental Figure 2. Analysis of the interactions of mutations and copy number lesions**

Hierarchical clustering of significant lesions defined by GISTIC and oncogene mutations using the reciprocal co-occurrence ratio as distance measure and average linkage of clusters. The distance of the clusters is reflected in the length of the branches. Note that mutations in *EGFR* and *KRAS* occur in a mutually exclusive fashion, while *EGFR* mutation and amplification are found in the same cluster. Amplifications are depicted in red and deletions in blue. Relevant genes within GISTIC peaks are annotated.

#### **Supplemental Figure 3. Phenotypic properties of primary tumors are conserved in erlotinib-sensitive lung cancer cells.**

**(A)** Hierarchical clustering of primary lung adenocarcinomas was performed using genes identified as being differentially expressed in erlotinib-sensitive versus erlotinib-resistant NSCLC cell lines. Red bars represent *EGFR*-mutant tumors. **(B)** The *EGFR* mutation signature published by Choi et al. was used to perform hierarchical clustering of primary lung adenocarcinomas. Red bars represent *EGFR*-mutant tumors.

#### **Supplemental Figure 4. Characterization of compounds used in the screen**

Displayed are the chemical structures, the development phase and the main known targets for all compounds used in the screening experiments. Also, the maximum concentrations used in the high-throughput (10  $\mu$ M for 17-AAG, erlotinib, vandetanib, lapatinib, sunitinib,

rapamycin and PD168393, 30  $\mu$ M for purvalanol, SU-11274, dasatinib, 60  $\mu$ M for VX-680, 90  $\mu$ M for UO126) are depicted.

### **Supplemental Figure 5. Mutated EGFR as a target for vandetanib activity**

**(A)** Left panel: Vandetanib represented as pink ballandsticks is modeled into the ATP binding site of EGFR based on its crystallographically determined binding mode with the RET kinase. Right panel: The T790M mutation at the gatekeeper position of the ATP pocket, associated with secondary EGFR-inhibitor resistance in patients. **(B)** Ba/F3 cells expressing mutant (del Ex19 or Ex19/T790M) EGFR were treated for 12h with the indicated concentrations of either vandetanib or erlotinib and whole-cell lysates were immunoblotted for phospho-EGFR and EGFR. **(C)** Dose-dependent growth inhibition after 96h treatment with either dasatinib or erlotinib was assessed measuring cellular ATP content.

### **Supplemental Figure 6. Lesion-based prediction for activity of UO126**

Distribution of copy number gain at 1q21.3 (black columns) across the UO126-sensitivity profile ( $GI_{50}$  values) in the NSCLC cell line collection and the hypothemycin-sensitivity profile in the NCI-60 cell line panel. Incidence of amplification of 1q21.3 and sensitivity towards UO126 and hypothemycin is represented by a contingency table for both datasets.

### **Supplemental Figure 7. Analysis of activity of 17-AAG**

**(A)** Displayed is the induction of apoptosis after treatment with 17-AAG as measured by FACS analysis, utilizing Annexin-V/PI staining as a surrogate marker for apoptosis. DMSO (0.1%) was used as control. The fraction of cells either positive for Annexin-V or PI are defined as apoptotic. **(B)** Validation of 17-AAG as an inhibitor of chaperonage of mutated EGFR by HSP90. Immunohistochemical detection of total EGFR protein after immunoprecipitation of HSP90 of EGFR mutated PC9 cell lines before and after treatment with 1 $\mu$ M of erlotinib is depicted. **(C)** Validation of the antibody for total protein of KRAS using lentiviral shRNA transfection. Immunohistochemical detection of total KRAS protein as well as actin as loading control of parental A549 cells, A549 cell lines transduced with an empty vector (A549<sup>cont</sup>) and shRNA targeting KRAS (A549<sup>KRASkd</sup>)

### **Supplemental Figure 8. Inhibition of HSP90 leads to tumor regression in transgenic lox-stop-lox<sup>KRASG12D</sup> mice**

Displayed are the MRI scans of lox-stop-lox<sup>KRASG12D</sup> before and after treatment with either 17-DMAG or placebo. The areas of lung tumors were manually segmented, measured on each MR slice and total tumor volume reduction was calculated for each mouse treated with 17-DMAG or placebo.

### **Supplemental Figure 9. TESP prediction model for activity of erlotinib and dasatinib**

**(A)** Cell lines according to their sensitivity to erlotinib ( $GI_{50} < 1 \mu\text{M}$ ; yellow bars) are displayed. Cell lines enriched for sensitivity to erlotinib are found among those with highest copy numbers for *EGFR*. The contingency table for *EGFR* amplification and erlotinib sensitivity including the p-value determined using fisher's exact test are displayed in the right panel. **(B)** Left panel: Distribution of *TESP* gene positive cells (black columns and asterisks) across the dasatinib-sensitivity profile ( $GI_{50}$ -values) in the NSCLC cell line collection. Incidence of *TESP* gene positive cells and sensitivity ( $GI_{50} < 0.1 = \text{sensitive}$ ;  $GI_{50} > 0.1 = \text{resistant}$ ) towards dasatinib are represented by a fisher's exact test. Right panel: Distribution of  $GI_{50}$ -values for cells with amplification of 2 *TESP* genes (*TESP+* [2 genes]) and cells without amplification in these genes. **(C)** Left panel: In H322M cells levels of phosphorylated-SRC (p-SRC) and the corresponding SRC-protein levels were detected by immunoblotting after treatment with dasatinib. Right panel: Viability of H322M cells was measured after treatment with dasatinib at the indicated concentrations.

### **Supplemental Figure 10. Validation of EphA3 as a relevant target for dasatinib activity.**

**(A)** H28 cells harboring amplified *EphA3* were either left untreated, transduced with an empty vector control (H28 control) or with shRNA targeting *EphA3* (H28 EphA3). After puromycin selection, levels of EphA3 in H28 cells transduced with the indicated vectors were analyzed by immunoblotting (top). Bottom: Viability was quantified by cell counting. Error bars represent standard deviation between different experiments.

### **Supplemental Table 1. The NSCLC cell line collection**

Overview over the NSCLC cell line collection used in the study including providers and morphopathological details.

### **Supplemental Table 2. Significant lesions in lung cancer**

Summary of regions with significant copy number alterations as defined by GISTIC in the cell line panel and a primary lung cancer panel.

### **Supplemental Table 3. All significant copy number lesions as defined by GISTIC across all cell lines**

All cell lines are annotated for presence ("1") or absence ("0") of a given lesion for different copy number thresholds as defined by GISTIC.

### **Supplemental Table 4. Analysis of homozygous deletions and LOH**

Regions targeted by homozygous deletions (HD) and by loss of heterozygosity (LOH) inferred from SNP array data are displayed in this table.

**Supplemental Table 5. Raw sensitivity data for screened compounds and mutational status**

Overview over the half maximal inhibitory concentrations ( $GI_{50}$  values; [ $\mu$ M]) derived from high-throughput cell line based screening and analysis of the respective preimage under the kill curve for each cell line and each compound. Additionally, all cell lines are annotated for presence ("1") or absence ("0") of mutations in *EGFR*, *KRAS*, *NRAS*, *BRAF*, *PIK3CA* and *EML4/ALK*.

**Supplemental Table 6. Expression signature of *EGFR*-mutated cell lines**

The probestes of the Affymetrix U133A platform, the genes, the accession number, the fold change, the difference of means as well as the *p*-values are displayed for the genes identifying an *EGFR*-mutation signature in cell lines.

**Supplemental Table 7. Multi-lesion predictors of sensitivity**

Multi-lesion predictors of sensitivity tested with the KNN method, Fisher's exact test and *t*-test are displayed. Only significant predictors are displayed for two different copy number thresholds for all compounds analyzed in the cell line based screening.

**Supplemental Table 8. TESP prediction of activity of dasatinib**

The  $GI_{50}$ -values of dasatinib across all cell lines are displayed. All cell lines are annotated for presence ("1") or absence ("0") of copy number > 3 of genes identified as predictors of dasatinib activity (*EPHA3*, *ABL2*, *LCK*, *BLK*, *SRC*, *EPHA5*, *EPHA8*, *YES1*, *FRK*).

# Supplemental Figure 1

**A**

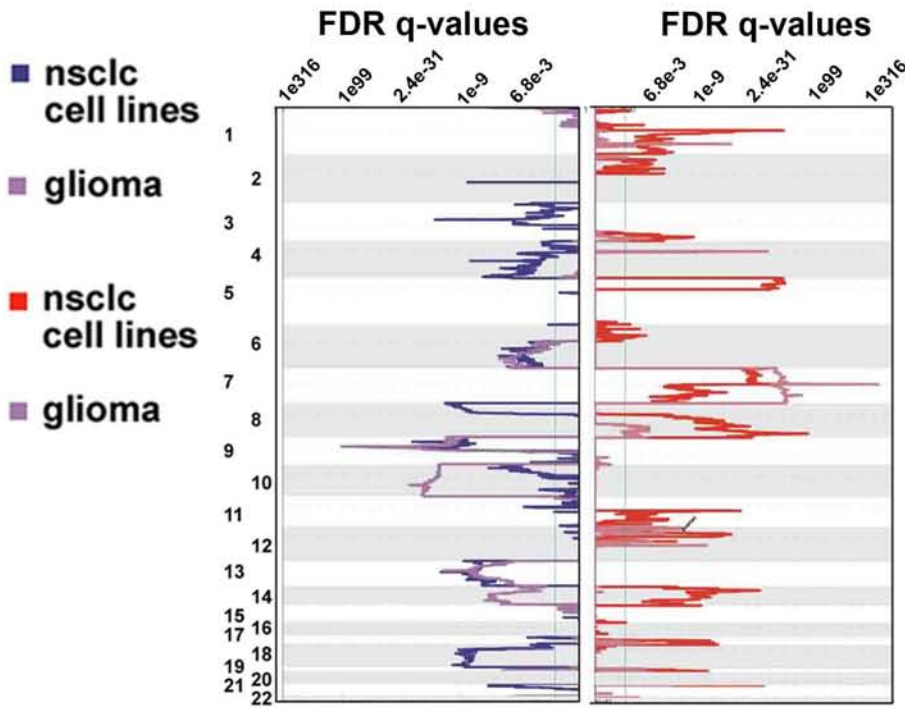

**C**

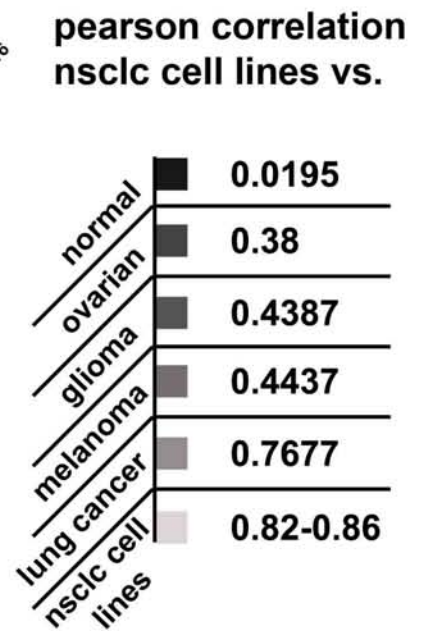

**B**

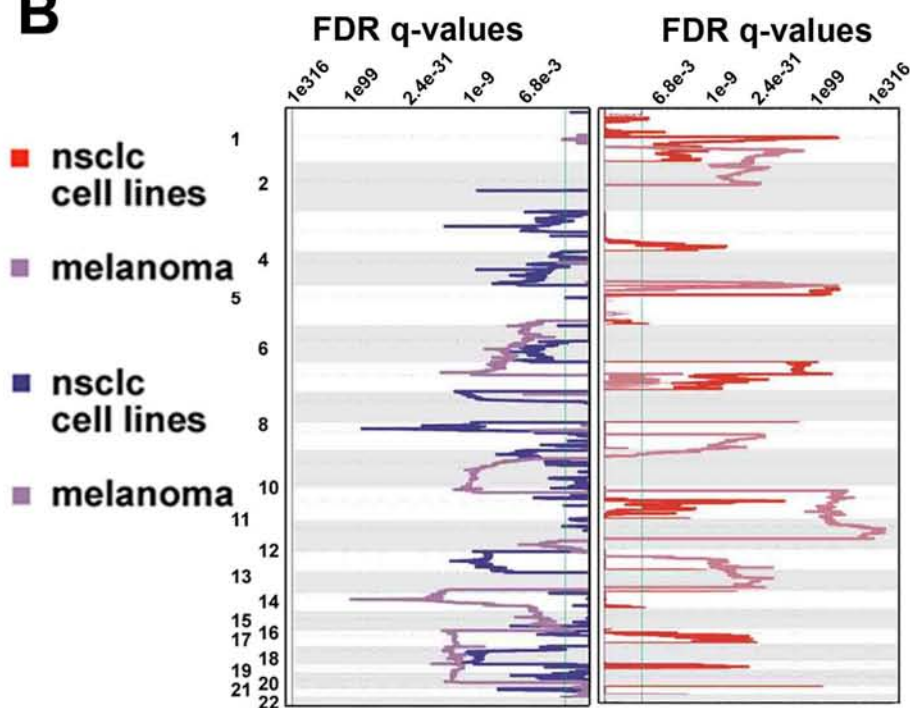

## Supplemental Figure 2

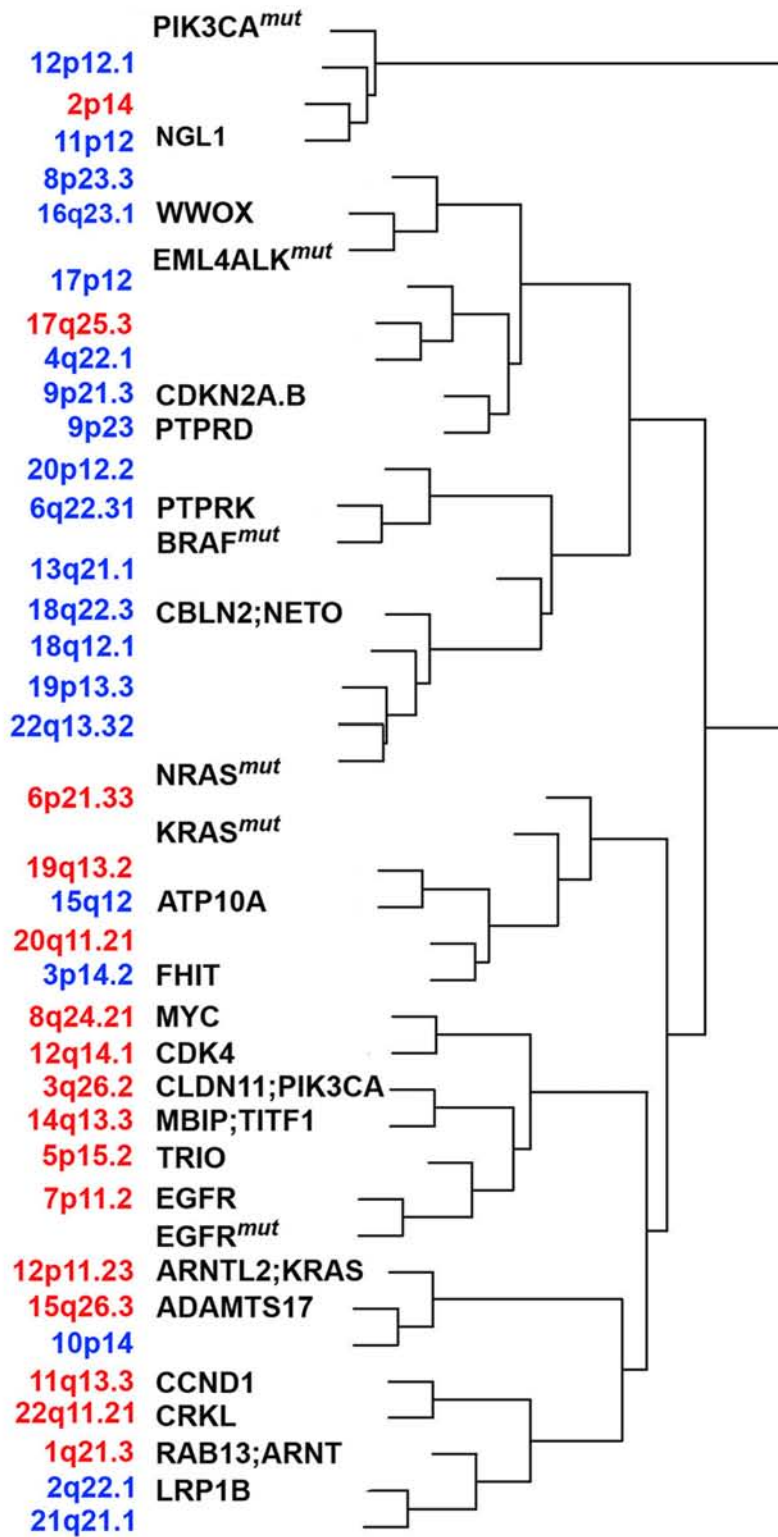

# Supplemental Figure 3

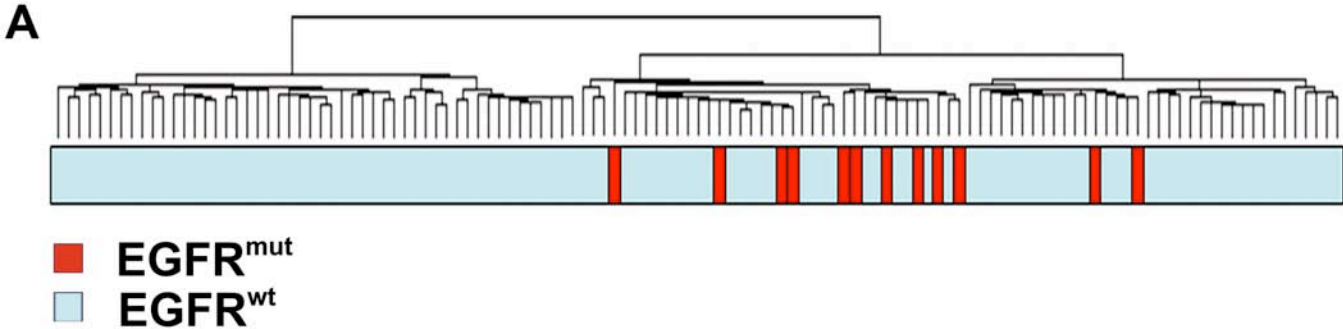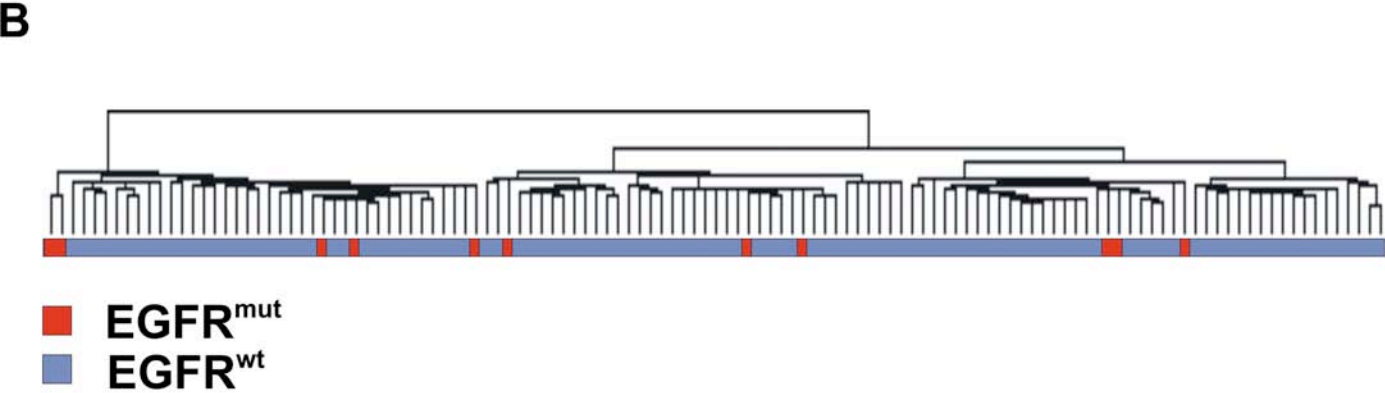

# Supplemental Figure 4

|                                                                                     |                                                                                                            |                                                                                                |                                                                                     |                                                                |                                                                                                              |
|-------------------------------------------------------------------------------------|------------------------------------------------------------------------------------------------------------|------------------------------------------------------------------------------------------------|-------------------------------------------------------------------------------------|----------------------------------------------------------------|--------------------------------------------------------------------------------------------------------------|
| 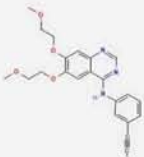   | <p><b>Erlotinib</b></p> <p>known targets:<br/>EGFR</p>                                                     | <p>max-conc.: 10<math>\mu</math>M</p> <p>development phase:<br/>approved<br/>(NSCLC)</p>       |    | <p><b>Purvalanol A</b></p> <p>known targets:<br/>CDK1</p>      | <p>max-conc.: 90<math>\mu</math>M</p> <p>development phase:<br/>experimental</p>                             |
|    | <p><b>Sunitinib</b></p> <p>known targets:<br/>PDGFR3-a, PDGFR-b,<br/>VEGFR, Kit, FLT3,<br/>CSF-1R, RET</p> | <p>max-conc.: 10<math>\mu</math>M</p> <p>development phase:<br/>approved<br/>(GIST, RCC)</p>   |    | <p><b>17-AAG</b></p> <p>known targets:<br/>Hsp90</p>           | <p>max-conc.: 10<math>\mu</math>M</p> <p>development phase:<br/>phaseII<br/>(solid tumors,<br/>lymphoma)</p> |
|    | <p><b>VX-680</b></p> <p>known targets:<br/>Aurora kinase</p>                                               | <p>max-conc.: 60<math>\mu</math>M</p> <p>development phase:<br/>phaseI<br/>(solid tumors)</p>  |    | <p><b>PD-168393</b></p> <p>known targets:<br/>EGFR</p>         | <p>max-conc.: 10<math>\mu</math>M</p> <p>development phase:<br/>experimental</p>                             |
|   | <p><b>Rapamycin</b></p> <p>known targets:<br/>mTOR</p>                                                     | <p>max-conc.: 10<math>\mu</math>M</p> <p>development phase:<br/>phaseII<br/>(solid tumors)</p> |   | <p><b>Dasatinib</b></p> <p>known targets:<br/>Src, Bcr/Abl</p> | <p>max-conc.: 30<math>\mu</math>M</p> <p>development phase:<br/>approved<br/>(CML)</p>                       |
|  | <p><b>SU-11274</b></p> <p>known targets:<br/>c-Met</p>                                                     | <p>max-conc.: 30<math>\mu</math>M</p> <p>development phase:<br/>experimental</p>               |  | <p><b>Vandetanib</b></p> <p>known targets:<br/>VEGFR, EGFR</p> | <p>max-conc.: 10<math>\mu</math>M</p> <p>development phase:<br/>phaseIII<br/>(NSCLC)</p>                     |
|  | <p><b>UO-126</b></p> <p>known targets:<br/>MEK</p>                                                         | <p>max-conc.: 90<math>\mu</math>M</p> <p>development phase:<br/>experimental</p>               |  | <p><b>Lapatinib</b></p> <p>known targets:<br/>ErbB2, EGFR</p>  | <p>max-conc.: 10<math>\mu</math>M</p> <p>development phase:<br/>approved<br/>(breast cancer)</p>             |



# Supplemental Figure 5

**A**

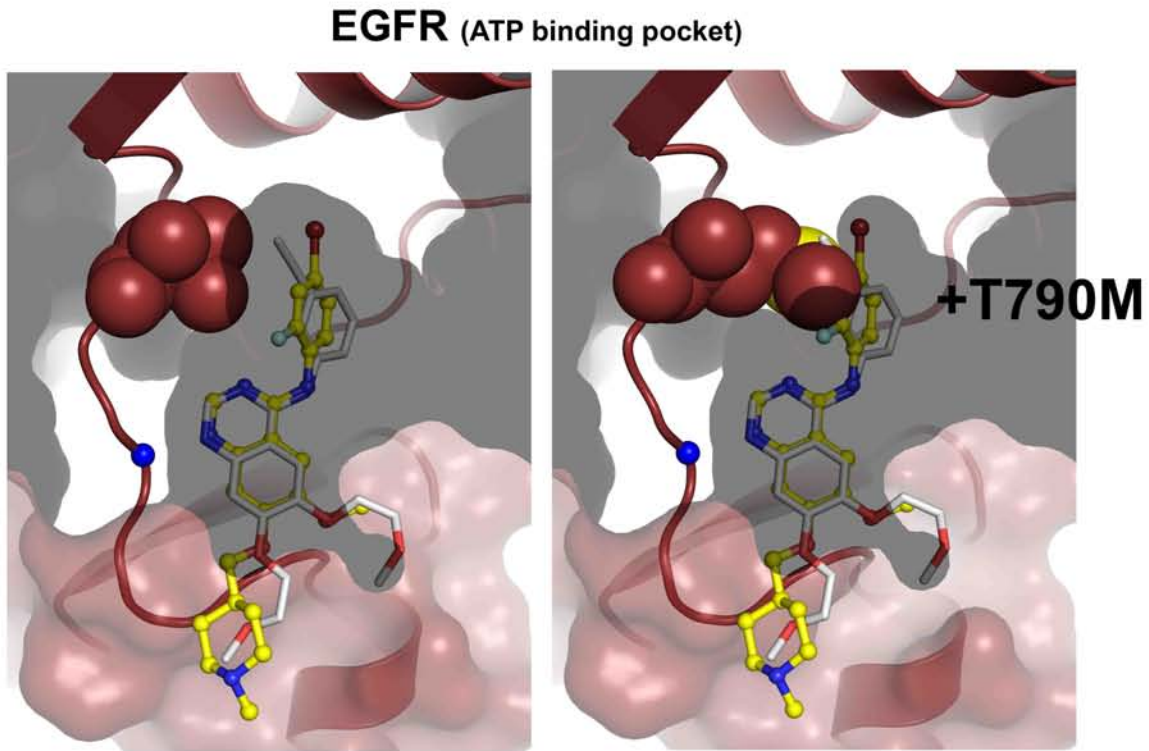

**B**

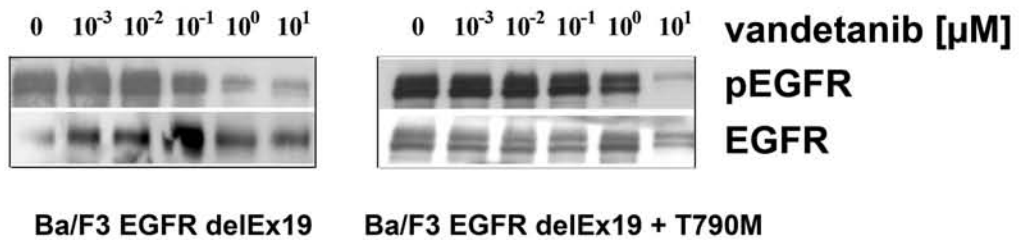

**C**

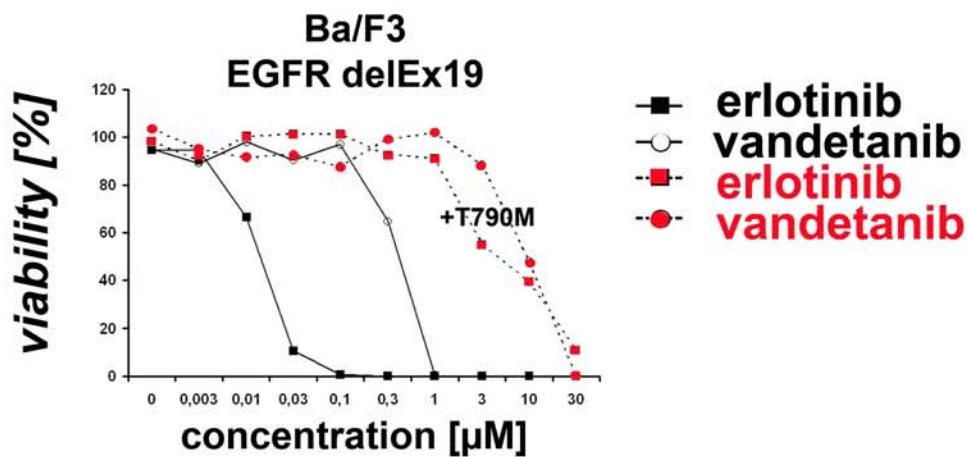

# Supplemental Figure 6

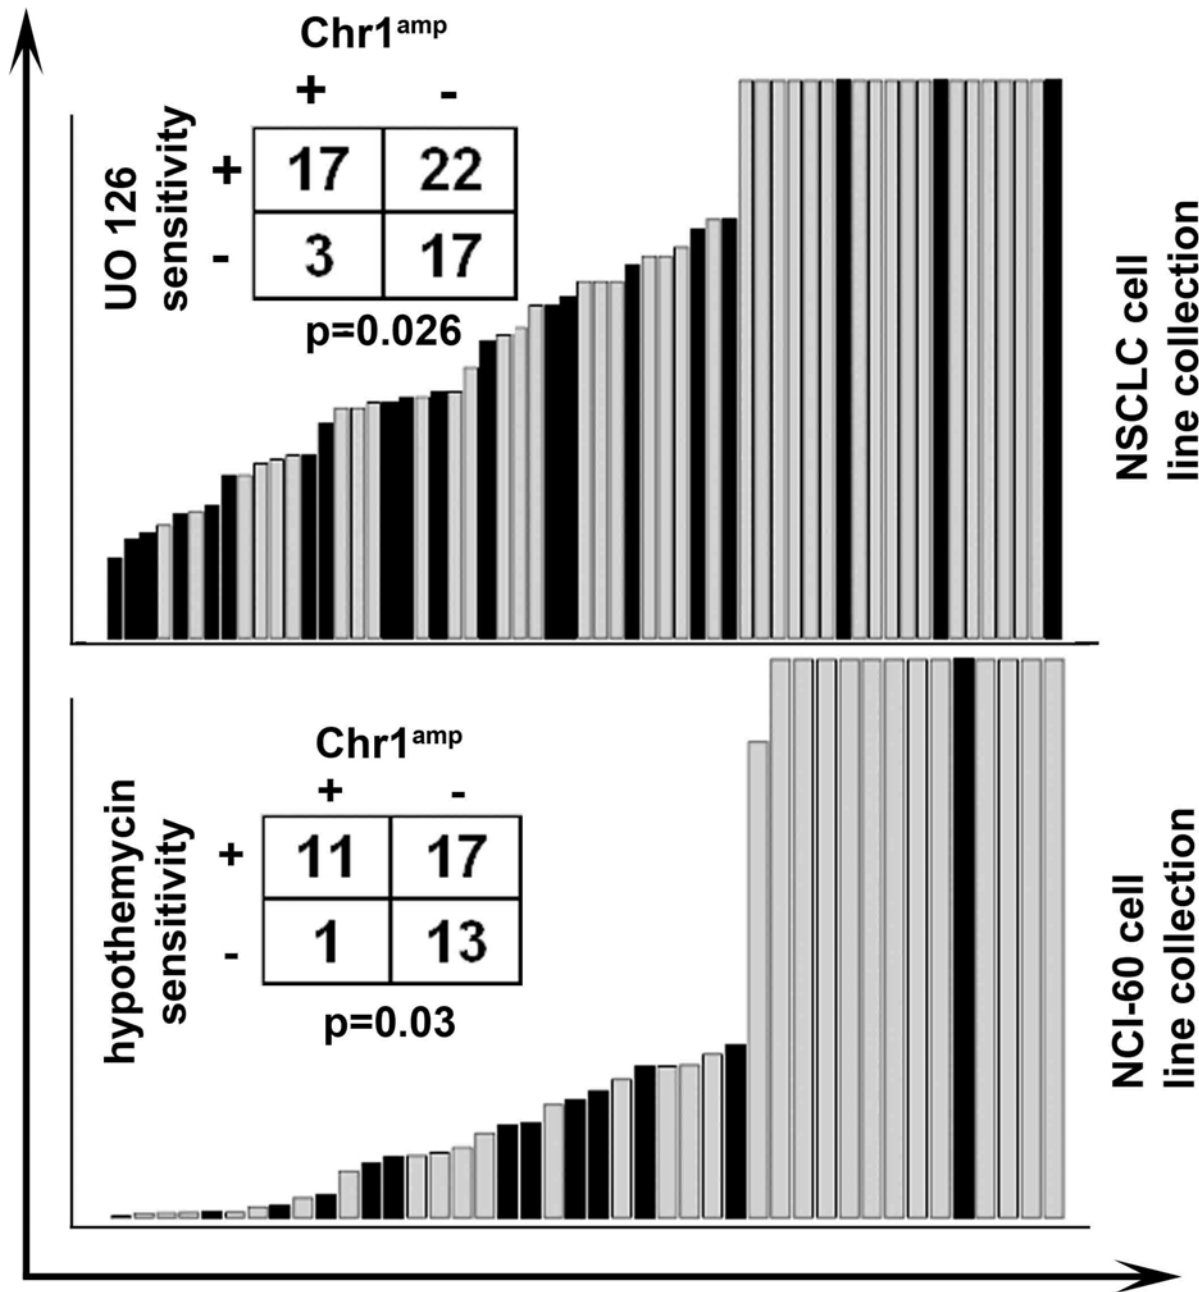

# Supplemental Figure 7

**A**

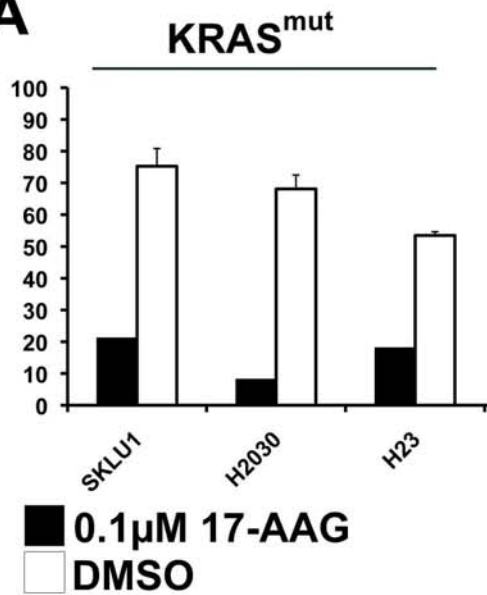

| cell line | GI <sub>50</sub> 17AAG [μM] | GI <sub>50</sub> 17-DMAG [μM] | KRAS |
|-----------|-----------------------------|-------------------------------|------|
| H2030     | 0.0285                      | 0.026                         | mut  |
| H358      | 0.0355                      | 0.0266                        | mut  |
| SKLU1     | 0.0221                      | 0.0097                        | mut  |
| H1819     | 5.1286                      | 1.6406                        | wt   |
| H1838     | 4.6774                      | 3.1989                        | wt   |
| H322      | 0.0254                      | 0.0243                        | wt   |
| HCC15     | 0.0158                      | 0.009                         | wt   |
| HCC245    | 9.3325                      | 1.9724                        | wt   |
| HCC366    | 1                           | 3.5075                        | wt   |

**B**

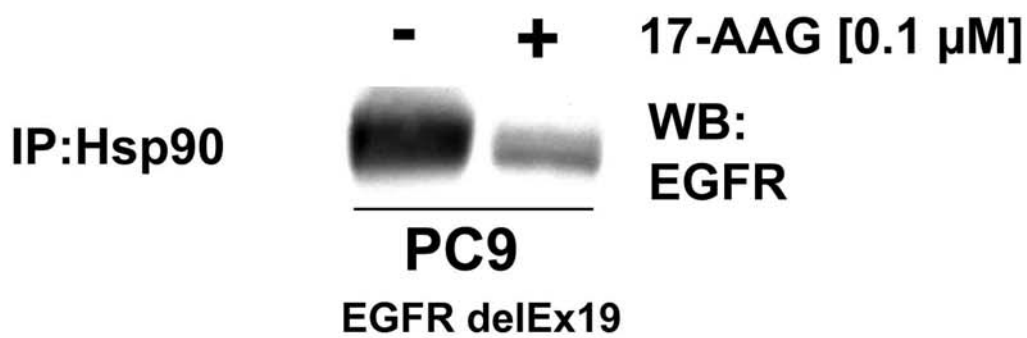

**C**

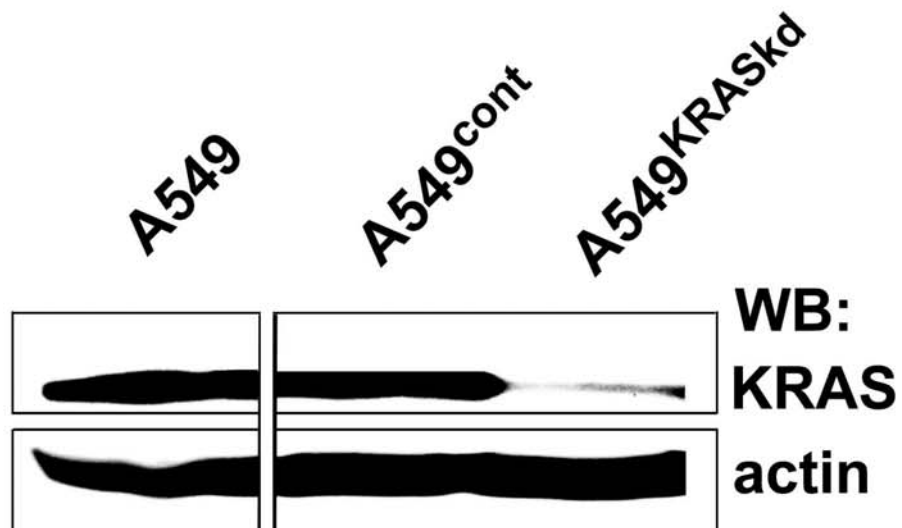

# Supplemental Figure 8

## 17DMAG

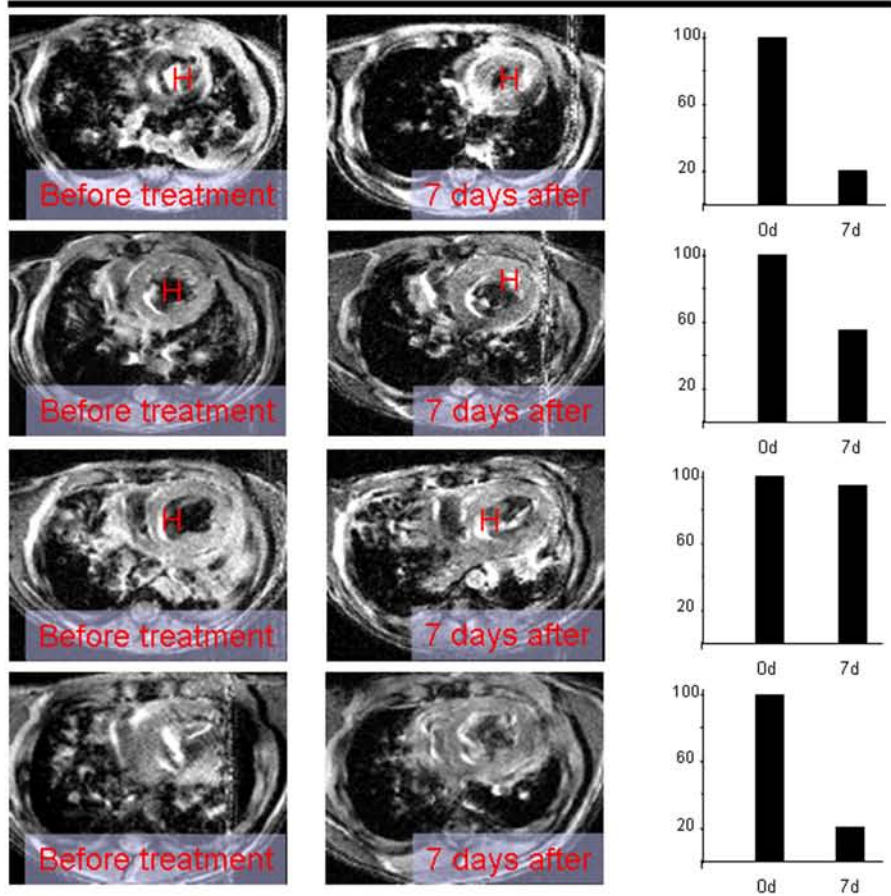

## vehicle

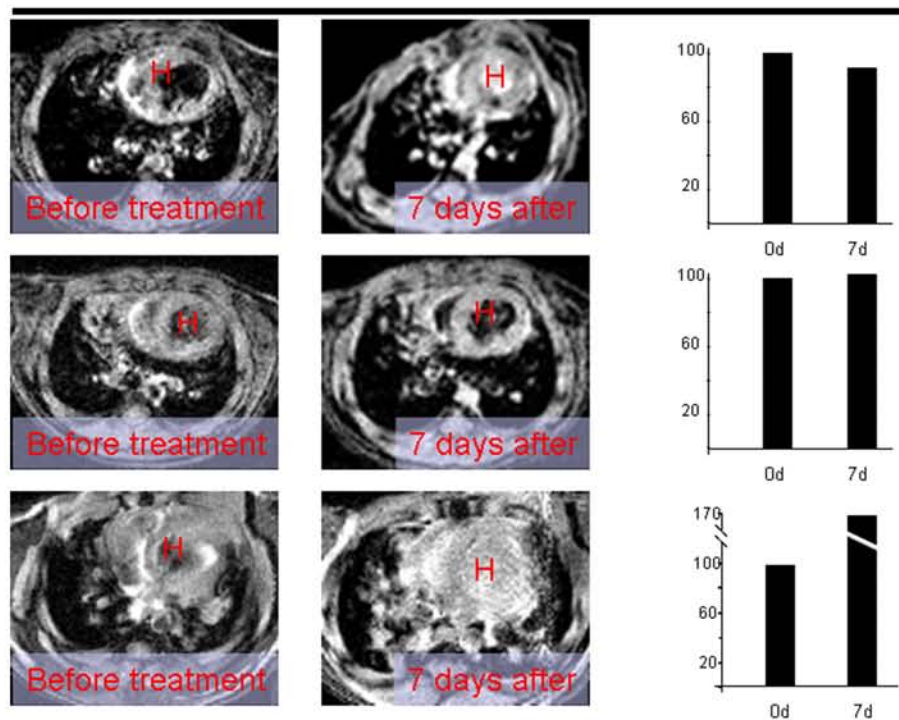

# Supplemental Figure 9

**A**

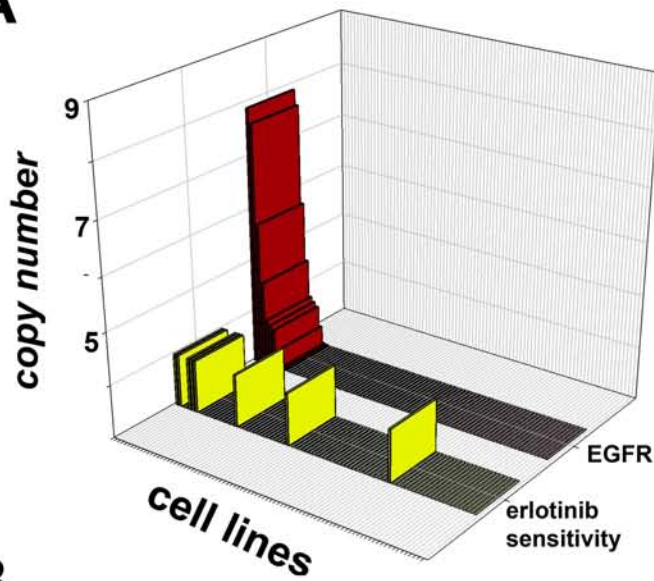

|                       |   | EGFR amplification |   |
|-----------------------|---|--------------------|---|
|                       |   | -                  | + |
| erlotinib sensitivity | + | 4                  | 5 |
|                       | - | 70                 | 3 |

**p=0.00023**

**B**

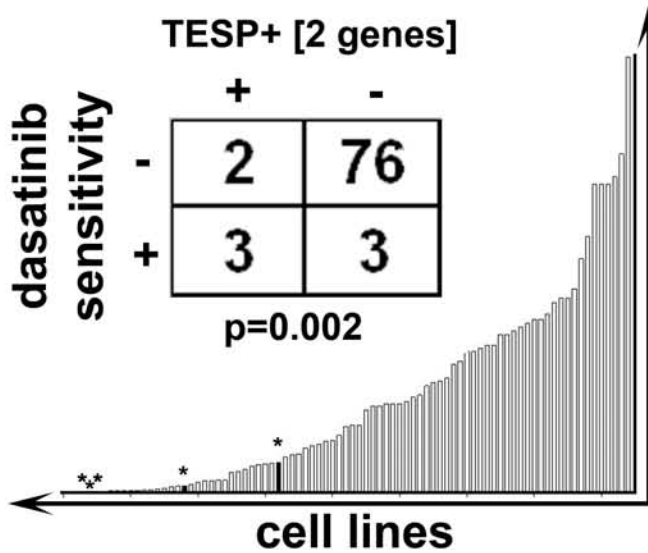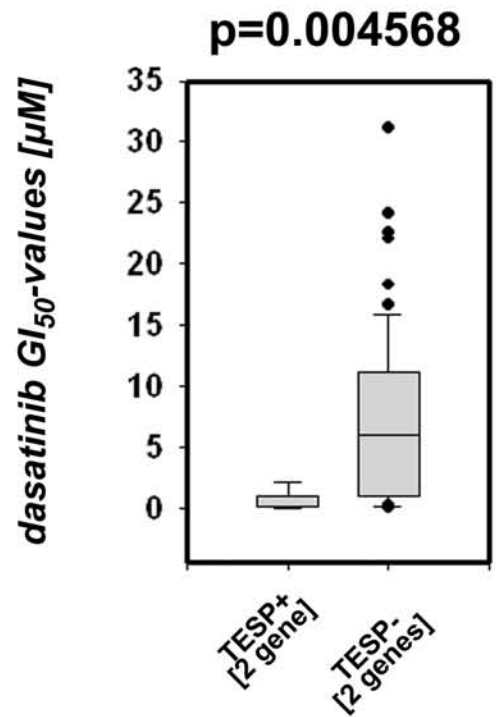

**C**

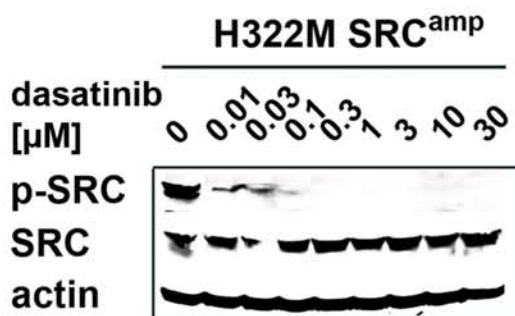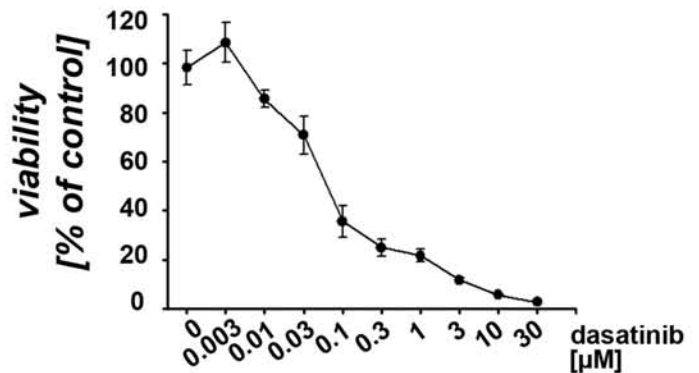

# Supplemental Figure 10

**A**

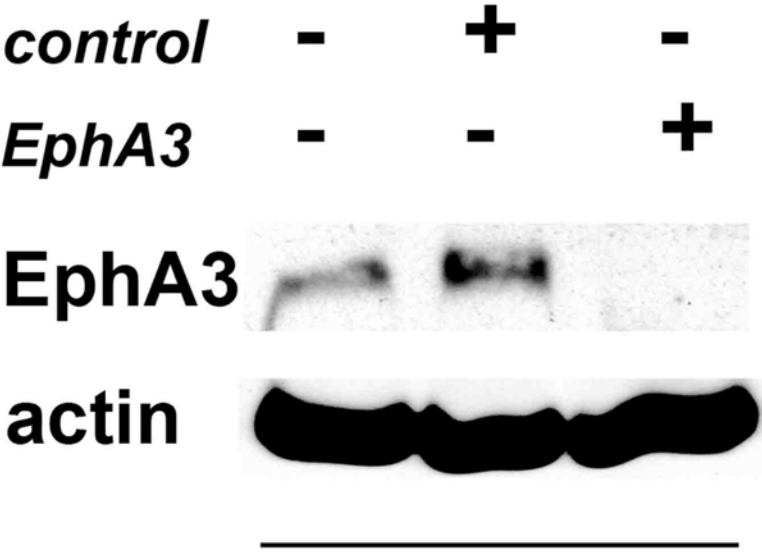

**H28**

**B**

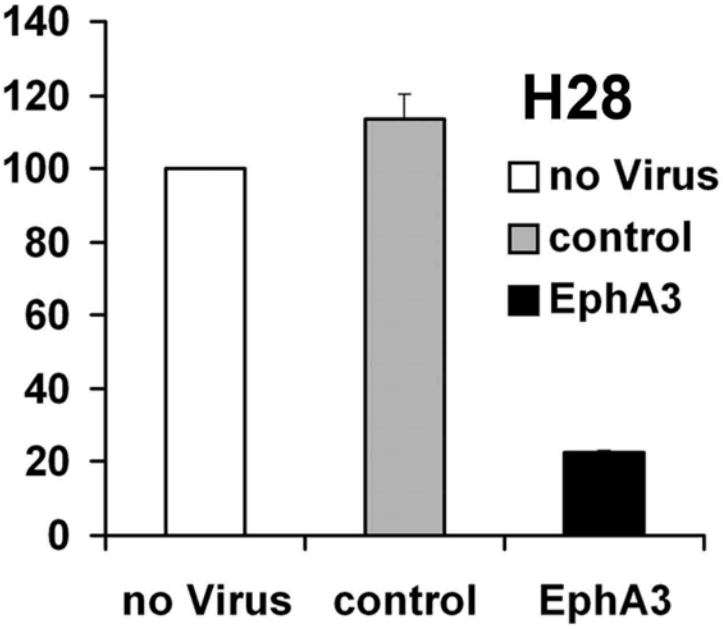



## Supplemental Table 2: regions of significant copy number alteration

### Regions of amplifications

| copy number threshold <sup>1</sup> | Cytoband <sup>2</sup> | FDR q-value | Wide Peak Region in DFC184 (Mb) | Cytoband in TSP <sup>3</sup> | Wide Peak Region in TSP (Mb) | Genes in/near Region |
|------------------------------------|-----------------------|-------------|---------------------------------|------------------------------|------------------------------|----------------------|
| 2.1                                | 1q21.3                | <0.0001     | 150,542,795-151,338,045         | 1q21.2                       | 143,482,820-149,412,049      | <i>RAB13, ARNT</i>   |
| 2.1                                | 2p14                  | 0.0117      | 63,688,807-66,001,043           | 2p15                         | 61.87-63.04                  |                      |
| 2.1                                | 3q26.2                | <0.0001     | 170,629,278-171,814,156         | 3q26.2                       | 171.56-172.26                | <i>PIK3CA</i>        |
| 4.0                                | 5p15.33               | <0.0001     | 1-1,990,922                     | 5p15.33                      | 752,191-1,620,796            | <i>TERT</i>          |
| 2.1                                | 5p15.2                | <0.0001     | 14,419,931-15,473,014           | 5p15.31                      | 8,882,312-10,508,224         | <i>TRIO</i>          |
| 2.1                                | 6p21.33               | 0.0422      | 30,736,062-31,121,519           | 6p21.33                      | 30-24-30.53                  |                      |
| 2.1                                | 7p11.2                | <0.0001     | 54,648,126-55,149,035           | 7p11.2                       | 54,648,493-55,520,504        | <i>EGFR</i>          |
| 4.0                                | 7q31.2                | 0.1456      | 115,731,478-117,706,917         | 7q21                         | 91.38-92.69                  | <i>MET</i>           |
| 2.1                                | 8q24.21               | <0.0001     | 128,774,432-129,267,084         | 8q24.21                      | 129,180,219-129,338,500      | <i>MYC</i>           |
| 2.1                                | 11q13.3               | <0.0001     | 68,663,579-69,722,671           | 11q13.3                      | 68,521,013-69,363,886        | <i>CCND1</i>         |
| 2.1                                | 12p11.23              | <0.0001     | 27,363,810-27,548,427           | 12p12.1                      | 24,985,489-25,781,318        | <i>ARNTL2, KRAS</i>  |
| 2.1                                | 12q14.1               | 0.0251      | 56,109,460-56,444,824           | 12q14.1                      | 56,229,240-56,542,276        | <i>CDK4</i>          |
| 4.0                                | 12q12                 | 0.1217      | 39,411,240-40,584,197           |                              |                              | <i>CNTN1</i>         |
| 2.1                                | 14q13.3               | <0.0001     | 34,944,606-35,958,140           | 14q13.3                      | 35,612,514-36,086,539        | <i>MBIP, TITF1</i>   |
| 2.1                                | 15q26.3               | 0.2168      | 98,087,320-100,338,915          |                              |                              |                      |
| 2.1                                | 17q25.3               | <0.0001     | 74,109,719-77,292,455           |                              |                              |                      |
| 4.0                                | 17q21.1               | 0.0868      | 34,801,581-36,251,125           | 17q12                        | 34,801,581-35,184,745        | <i>ERBB2</i>         |
| 2.1                                | 19q13.2               | <0.0001     | 43,723,903-44,843,953           |                              |                              | <i>MAP4K1</i>        |
| 2.1                                | 20q11.21              | <0.0001     | 29,620,040-29,834,552           |                              |                              |                      |
| 2.1                                | 22q11.21              | 0.0003      | 18,249,977-20,297,872           | 22q11.21                     | 19,057,364-20,130,954        | <i>CRKL, PIK4CA</i>  |
| copy number threshold <sup>1</sup> | Cytoband <sup>2</sup> | FDR q-value | Wide Peak Region in DFC184 (Mb) | Cytoband in TSP <sup>3</sup> | Wide Peak Region in TSP (Mb) | Genes in/near Region |
| 2.1                                | 2q22.1                | <0.0001     | 141,719,224-141,796,375         |                              |                              | <i>LRP1B</i>         |
| 2.1                                | 3p14.2                | <0.0001     | 60,423,632-60,473,926           |                              |                              | <i>FHIT</i>          |
| 4.0                                | 3p26.1                | 0.1126      | 4,696,625-4,779,198             |                              |                              | <i>ITPR1</i>         |
| 2.1                                | 4q22.1                | <0.0001     | 92,179,849-92,538,585           |                              |                              |                      |
| 2.1                                | 6q22.3                | 0.0002      | 124,244,289-131,275,700         |                              |                              |                      |
| 2.1                                | 8p23.3                | <0.0001     | 773,665-3,127,121               | 8p23.2                       | 2,536,925-3,946,831          | <i>CSMD1</i>         |
| 2.1                                | 9p21.3                | <0.0001     | 22,009,130-22,014,350           | 9p21.3                       | 21,797,995-22,194,444        | <i>CDKN2A/CDKN2B</i> |
| 2.1                                | 9p23                  | 0.0004      | 9,312,827-9,383,042             | 9p23                         | 9,400,074-10,398,148         | <i>PTPRD</i>         |
| 2.1                                | 10p14                 | <0.0001     | 8,778,915-11,619,551            |                              |                              |                      |
| 2.1                                | 11p12                 | 0.0118      | chr11:39257589-40231417         |                              |                              |                      |
| 2.1                                | 12p12.1               | 0.2082      | 22844630-23030954               |                              |                              |                      |
| 2.1                                | 13q21.1               | <0.0001     | 54,838,383-55,162,968           |                              |                              |                      |
| 4.0                                | 13q12.11              | 0.0059      | 18,425,674-18,807,764           |                              |                              | <i>TUBA2</i>         |
| 2.1                                | 15q12                 | 0.0677      | 23,653,373-23,942,257           |                              |                              |                      |
| 2.1                                | 16q23.1               | 0.0003      | 77,121,334-7,7191,551           |                              |                              | <i>WWOX</i>          |
| 2.1                                | 17p12                 | 0.0184      | 13,267,969-14,095,575           |                              |                              |                      |
| 2.1                                | 18q22.3               | <0.0001     | 66,736,766-69,429,889           |                              |                              |                      |
| 2.1                                | 18q12.1               | 0.1253      | 24,117,347-24,520,932           |                              |                              |                      |
| 2.1                                | 19p13.3               | 0.0249      | 1-530,099                       |                              |                              |                      |
| 2.1                                | 20p12.2               | 0.0003      | 10336942-10589574               |                              |                              |                      |
| 4.0                                | 21q11.2               | 0.0001      | 14415233-14570355               |                              |                              |                      |
| 2.1                                | 21q21.1               | <0.0001     | 20,200,989-20,525,154           |                              |                              |                      |
| 2.1                                | 22q13.32              | 0.0609      | 47,431,241-47,858,705           |                              |                              |                      |

<sup>1</sup> The GISTIC algorithm was run using two different copy number thresholds to assign genomic segments across the SNP data based on the GLAD (Gain and Loss Analysis of DNA) segmentation algorithm (Phipps et al., 2004). Copy number thresholds were set for copy number 4 (GLAD 16) and copy number 2.14 (GLAD 16.14). Analysis in this study was performed based on results derived from GISTIC using copy number 16.14.

<sup>2</sup> based on hg17 human genome assembly

<sup>3</sup> regions of significant copy number gain and loss in primary lung adenocarcinomas (Weir et al., 2007)





| Lesion        | Lesion Type   | Cytoband |
|---------------|---------------|----------|
| RAB13, ARNT   | amplification | 1q21.3   |
|               | amplification | 2p14     |
| PIK3CA        | amplification | 3q26.2   |
| TRIO          | amplification | 5p15.2   |
|               | amplification | 6p21.33  |
| EGFR          | amplification | 7p11.2   |
| MYC           | amplification | 8q24.21  |
| CCND1         | amplification | 11q13.3  |
| ARNTL2, KRAS  | amplification | 12p11.23 |
|               | amplification | 12q14.1  |
| MBIP, TITF1   | amplification | 14q13.3  |
|               | amplification | 15q26.3  |
|               | amplification | 17q25.3  |
| MAPK4K1       | amplification | 19q13.2  |
|               | amplification | 20q11.21 |
| CRKL, PK4CA   | amplification | 22q11.21 |
| LRP1B         | deletion      | 2q22.1   |
| FHT           | deletion      | 3p14.2   |
|               | deletion      | 4q22.1   |
|               | deletion      | 6q22.3   |
| CSMD1         | deletion      | 8p23.3   |
| CDKN2A/CDKN2B | deletion      | 9q21.3   |
| PTPRD         | deletion      | 9p23     |
|               | deletion      | 10p14    |
|               | deletion      | 11p12    |
|               | deletion      | 12p12.1  |
|               | deletion      | 13q21.1  |
|               | deletion      | 15q12    |
| WFOX          | deletion      | 16q23.1  |
|               | deletion      | 17p12    |
|               | deletion      | 18q22.3  |
|               | deletion      | 18q12.1  |
|               | deletion      | 19p13.3  |
|               | deletion      | 20p12.2  |
|               | deletion      | 21q21.1  |
|               | deletion      | 22q13.32 |

copy number 2, 14 threshold 0.5

| Lesion  | Lesion Type   | Cytoband |
|---------|---------------|----------|
| A427    |               |          |
| A549    |               |          |
| CAM3    |               |          |
| Cam6    |               |          |
| Cd66b9  |               |          |
| EXX     |               |          |
| HI299   |               |          |
| HI355   |               |          |
| HI383   |               |          |
| HI437   |               |          |
| HI563   |               |          |
| HI578   |               |          |
| HI648   |               |          |
| HI650   |               |          |
| HI724   |               |          |
| HI755   |               |          |
| HI770   |               |          |
| HI819   |               |          |
| HI915   |               |          |
| HI944   |               |          |
| HI975   |               |          |
| HI009   |               |          |
| HI030   |               |          |
| HI052   |               |          |
| HI087   |               |          |
| HI110   |               |          |
| HI122   |               |          |
| HI172   |               |          |
| HI228   |               |          |
| HI244   |               |          |
| HI282   |               |          |
| HI287   |               |          |
| HI312   |               |          |
| HI324   |               |          |
| HI325   |               |          |
| HI358   |               |          |
| HI460   |               |          |
| HI520   |               |          |
| HI522   |               |          |
| HI531   |               |          |
| HI647   |               |          |
| HI661   |               |          |
| HI681   |               |          |
| HCC1171 |               |          |
| HCC1195 |               |          |
| HCC1359 |               |          |
| HCC1833 |               |          |
| HCC1833 |               |          |
| HCC1913 |               |          |
| HCC2429 |               |          |
| HCC2450 |               |          |
| HCC2935 |               |          |
| HCC386  |               |          |
| HCC4006 |               |          |
| HCC441  |               |          |
| HCC451  |               |          |
| HCC515  |               |          |
| HCC718  |               |          |
| HCC957  |               |          |
| HOP62   |               |          |
| HOP910  |               |          |
| LCC37W  |               |          |
| LOAH91  |               |          |
| KO1     |               |          |
| SKLU    |               |          |
|         | amplification | 1q21.3   |
|         | amplification | 2p14     |
|         | amplification | 3q26.2   |
|         | amplification | 5p15.2   |
|         | amplification | 6p21.33  |
|         | amplification | 7p11.2   |
|         | amplification | 8q24.21  |
|         | amplification | 11q13.3  |
|         | amplification | 12p11.23 |
|         | amplification | 12q14.1  |
|         | amplification | 14q13.3  |
|         | amplification | 15q26.3  |
|         | amplification | 17q25.3  |
|         | amplification | 19q13.2  |
|         | amplification | 20q11.21 |
|         | amplification | 22q11.21 |
|         | deletion      | 2q22.1   |
|         | deletion      | 3p14.2   |
|         | deletion      | 4q22.1   |
|         | deletion      | 6q22.3   |
|         | deletion      | 8p23.3   |
|         | deletion      | 9q21.3   |
|         | deletion      | 9p23     |
|         | deletion      | 10p14    |
|         | deletion      | 11p12    |
|         | deletion      | 12p12.1  |
|         | deletion      | 13q21.1  |
|         | deletion      | 15q12    |
|         | deletion      | 16q23.1  |
|         | deletion      | 17p12    |
|         | deletion      | 18q22.3  |
|         | deletion      | 18q12.1  |
|         | deletion      | 19p13.3  |
|         | deletion      | 20p12.2  |
|         | deletion      | 21q21.1  |
|         | deletion      | 22q13.32 |

| Lesion | Lesion Type   | Cytoband |
|--------|---------------|----------|
| A427   | amplification | 1q21.3   |
| A449   | amplification | 2p14     |
| A549   | amplification | 3q26.2   |
| Calu3  | amplification | 5p15.2   |
| Calu6  | amplification | 6p21.33  |
| CO6869 | amplification | 7p11.2   |
| EXX    | amplification | 8q24.21  |
| H1299  | amplification | 11q13.3  |
| H1535  | amplification | 12p11.23 |
| H1538  | amplification | 12q14.1  |
| H1437  | amplification | 14q13.3  |
| H1563  | amplification | 15q26.3  |
| H1578  | amplification | 17q25.3  |
| H1648  | amplification | 19q13.2  |
| H1650  | amplification | 20q11.21 |
| H1724  | amplification | 22q11.21 |
| H1755  | deletion      | 2q22.1   |
| H1770  | deletion      | 3p14.2   |
| H1819  | deletion      | 4q22.1   |
| H1915  | deletion      | 6q22.3   |
| H1944  | deletion      | 8p23.3   |
| H1975  | deletion      | 9q21.3   |
| H2009  | deletion      | 9p23     |
| H2030  | deletion      | 10p14    |
| H2052  | deletion      | 11p12    |
| H2070  | deletion      | 12p12.1  |
| H2110  | deletion      | 13q21.1  |
| H2126  | deletion      | 15q12    |
| H2172  | deletion      | 16q23.1  |
| H2228  | deletion      | 17p12    |
| H2347  | deletion      | 18q22.3  |
| H2444  | deletion      | 18q12.1  |
| H2882  | deletion      | 19p13.3  |
| H2887  | deletion      | 20p12.2  |
| H3122  | deletion      | 21q21.1  |
| H3224  | deletion      | 22q13.32 |
| H3255  |               |          |
| H338   |               |          |
| H460   |               |          |
| H520   |               |          |
| H522   |               |          |
| H526   |               |          |
| H647   |               |          |
| H661   |               |          |
| H662   |               |          |
| H663   |               |          |
| H664   |               |          |
| H665   |               |          |
| H666   |               |          |
| H667   |               |          |
| H668   |               |          |
| H669   |               |          |
| H670   |               |          |
| H671   |               |          |
| H672   |               |          |
| H673   |               |          |
| H674   |               |          |
| H675   |               |          |
| H676   |               |          |
| H677   |               |          |
| H678   |               |          |
| H679   |               |          |
| H680   |               |          |
| H681   |               |          |
| H682   |               |          |
| H683   |               |          |
| H684   |               |          |
| H685   |               |          |
| H686   |               |          |
| H687   |               |          |
| H688   |               |          |
| H689   |               |          |
| H690   |               |          |
| H691   |               |          |
| H692   |               |          |
| H693   |               |          |
| H694   |               |          |
| H695   |               |          |
| H696   |               |          |
| H697   |               |          |
| H698   |               |          |
| H699   |               |          |
| H700   |               |          |
| H701   |               |          |
| H702   |               |          |
| H703   |               |          |
| H704   |               |          |
| H705   |               |          |
| H706   |               |          |
| H707   |               |          |
| H708   |               |          |
| H709   |               |          |
| H710   |               |          |
| H711   |               |          |
| H712   |               |          |
| H713   |               |          |
| H714   |               |          |
| H715   |               |          |
| H716   |               |          |
| H717   |               |          |
| H718   |               |          |
| H719   |               |          |
| H720   |               |          |
| H721   |               |          |
| H722   |               |          |
| H723   |               |          |
| H724   |               |          |
| H725   |               |          |
| H726   |               |          |
| H727   |               |          |
| H728   |               |          |
| H729   |               |          |
| H730   |               |          |
| H731   |               |          |
| H732   |               |          |
| H733   |               |          |
| H734   |               |          |
| H735   |               |          |
| H736   |               |          |
| H737   |               |          |
| H738   |               |          |
| H739   |               |          |
| H740   |               |          |
| H741   |               |          |
| H742   |               |          |
| H743   |               |          |
| H744   |               |          |
| H745   |               |          |
| H746   |               |          |
| H747   |               |          |
| H748   |               |          |
| H749   |               |          |
| H750   |               |          |
| H751   |               |          |
| H752   |               |          |
| H753   |               |          |
| H754   |               |          |
| H755   |               |          |
| H756   |               |          |
| H757   |               |          |
| H758   |               |          |
| H759   |               |          |
| H760   |               |          |
| H761   |               |          |
| H762   |               |          |
| H763   |               |          |
| H764   |               |          |
| H765   |               |          |
| H766   |               |          |
| H767   |               |          |
| H768   |               |          |
| H769   |               |          |
| H770   |               |          |
| H771   |               |          |
| H772   |               |          |
| H773   |               |          |
| H774   |               |          |
| H775   |               |          |
| H776   |               |          |
| H777   |               |          |
| H778   |               |          |
| H779   |               |          |
| H780   |               |          |
| H781   |               |          |
| H782   |               |          |
| H783   |               |          |
| H784   |               |          |
| H785   |               |          |
| H786   |               |          |
| H787   |               |          |
| H788   |               |          |
| H789   |               |          |
| H790   |               |          |
| H791   |               |          |
| H792   |               |          |
| H793   |               |          |
| H794   |               |          |
| H795   |               |          |
| H796   |               |          |
| H797   |               |          |
| H798   |               |          |
| H799   |               |          |
| H800   |               |          |
| H801   |               |          |
| H802   |               |          |
| H803   |               |          |
| H804   |               |          |
| H805   |               |          |
| H806   |               |          |
| H807   |               |          |
| H808   |               |          |
| H809   |               |          |
| H810   |               |          |
| H811   |               |          |
| H812   |               |          |
| H813   |               |          |
| H814   |               |          |
| H815   |               |          |
| H816   |               |          |
| H817   |               |          |
| H818   |               |          |
| H819   |               |          |
| H820   |               |          |
| H821   |               |          |
| H822   |               |          |
| H823   |               |          |
| H824   |               |          |
| H825   |               |          |
| H826   |               |          |
| H827   |               |          |
| H828   |               |          |
| H829   |               |          |
| H830   |               |          |
| H831   |               |          |
| H832   |               |          |
| H833   |               |          |
| H834   |               |          |
| H835   |               |          |
| H836   |               |          |
| H837   |               |          |
| H838   |               |          |
| H839   |               |          |
| H840   |               |          |
| H841   |               |          |
| H842   |               |          |
| H843   |               |          |
| H844   |               |          |
| H845   |               |          |
| H846   |               |          |
| H847   |               |          |
| H848   |               |          |
| H849   |               |          |
| H850   |               |          |
| H851   |               |          |
| H852   |               |          |
| H853   |               |          |
| H854   |               |          |
| H855   |               |          |
| H856   |               |          |
| H857   |               |          |
| H858   |               |          |
| H859   |               |          |
| H860   |               |          |
| H861   |               |          |
| H862   |               |          |
| H863   |               |          |
| H864   |               |          |
| H865   |               |          |
| H866   |               |          |
| H867   |               |          |
| H868   |               |          |
| H869   |               |          |
| H870   |               |          |
| H871   |               |          |
| H872   |               |          |
| H873   |               |          |
| H874   |               |          |
| H875   |               |          |
| H876   |               |          |
| H877   |               |          |
| H878   |               |          |
| H879   |               |          |
| H880   |               |          |
| H881   |               |          |
| H882   |               |          |
| H883   |               |          |
| H884   |               |          |
| H885   |               |          |
| H886   |               |          |
| H887   |               |          |
| H888   |               |          |
| H889   |               |          |
| H890   |               |          |
| H891   |               |          |
| H892   |               |          |
| H893   |               |          |
| H894   |               |          |
| H895   |               |          |
| H896   |               |          |
| H897   |               |          |
| H898   |               |          |
| H899   |               |          |
| H900   |               |          |
| H901   |               |          |
| H902   |               |          |
| H903   |               |          |
| H904   |               |          |
| H905   |               |          |
| H906   |               |          |
| H907   |               |          |
| H908   |               |          |
| H909   |               |          |
| H910   |               |          |
| H911   |               |          |
| H912   |               |          |
| H913   |               |          |
| H914   |               |          |
| H915   |               |          |
| H916   |               |          |
| H917   |               |          |
| H918   |               |          |
| H919   |               |          |
| H920   |               |          |
| H921   |               |          |
| H922   |               |          |
| H923   |               |          |
| H924   |               |          |
| H925   |               |          |
| H926   |               |          |
| H927   |               |          |
| H928   |               |          |
| H929   |               |          |
| H930   |               |          |
| H931   |               |          |
| H932   |               |          |
| H933   |               |          |
| H934   |               |          |
| H935   |               |          |
| H936   |               |          |
| H937   |               |          |
| H938   |               |          |
| H939   |               |          |
| H940   |               |          |
| H941   |               |          |
| H942   |               |          |
| H943   |               |          |
| H944   |               |          |
| H945   |               |          |
| H946   |               |          |
| H947   |               |          |
| H948   |               |          |
| H949   |               |          |
| H950   |               |          |
| H951   |               |          |
| H952   |               |          |
| H953   |               |          |
| H954   |               |          |
| H955   |               |          |
| H956   |               |          |
| H957   |               |          |
| H958   |               |          |
| H959   |               |          |
| H960   |               |          |
| H961   |               |          |
| H962   |               |          |
| H963   |               |          |
| H964   |               |          |
| H965   |               |          |
| H966   |               |          |
| H967   |               |          |
| H968   |               |          |
| H969   |               |          |
| H970   |               |          |
| H971   |               |          |
| H972   |               |          |
| H973   |               |          |
| H974   |               |          |
| H975   |               |          |
| H976   |               |          |
| H977   |               |          |
| H978   |               |          |
| H979   |               |          |
| H980   |               |          |
| H981   |               |          |
| H982   |               |          |
| H983   |               |          |
| H984   |               |          |
| H985   |               |          |
| H986   |               |          |
| H987   |               |          |
| H988   |               |          |
| H989   |               |          |
| H990   |               |          |
| H991   |               |          |
| H992   |               |          |
| H993   |               |          |
| H994   |               |          |
| H995   |               |          |
| H996   |               |          |
| H997   |               |          |
| H998   |               |          |
| H999   |               |          |
| H1000  |               |          |

| Lesion | Lesion Type   | Cytoband |
|--------|---------------|----------|
| A427   | amplification | 1q21.3   |
| A449   | amplification | 2p14     |
| A491   | amplification | 3q26.2   |
| CAM3   | amplification | 5p15.2   |
| CAM6   | amplification | 6p21.33  |
| CAM9   | amplification | 7p11.2   |
| CAM16  | amplification | 8q24.21  |
| CAM19  | amplification | 11q13.3  |
| CAM20  | amplification | 12p11.23 |
| CAM21  | amplification | 12q14.1  |
| CAM22  | amplification | 14q13.3  |
| CAM23  | amplification | 15q26.3  |
| CAM24  | amplification | 17q25.3  |
| CAM25  | amplification | 19q13.2  |
| CAM26  | amplification | 20q11.21 |
| CAM27  | amplification | 22q11.21 |
| CAM28  | deletion      | 2q22.1   |
| CAM29  | deletion      | 3p14.2   |
| CAM30  | deletion      | 4q22.1   |
| CAM31  | deletion      | 6q22.3   |
| CAM32  | deletion      | 8p23.3   |
| CAM33  | deletion      | 9q21.3   |
| CAM34  | deletion      | 9p23     |
| CAM35  | deletion      | 10p14    |
| CAM36  | deletion      | 11p12    |
| CAM37  | deletion      | 12p12.1  |
| CAM38  | deletion      | 13q21.1  |
| CAM39  | deletion      | 15q12    |
| CAM40  | deletion      | 16q23.1  |
| CAM41  | deletion      | 17p12    |
| CAM42  | deletion      | 18q22.3  |
| CAM43  | deletion      | 18q12.1  |
| CAM44  | deletion      | 19p13.3  |
| CAM45  | deletion      | 20p12.2  |
| CAM46  | deletion      | 21q21.1  |
| CAM47  | deletion      | 22q13.32 |

copy number 2.14 threshold 1.0

| Lesion        | Lesion Type   | Cytoband |
|---------------|---------------|----------|
| RAB13, ARNT   | amplification | 1q21.3   |
| PK3CA         | amplification | 1q22.1   |
| TERT          | amplification | 5p13.33  |
| TRIO          | amplification | 9p11     |
| EGFR          | amplification | 9p14.3   |
| EGFR          | amplification | 8q21.2   |
| EGFR          | amplification | 7p11.2   |
| EGFR          | amplification | 7q22.3   |
| EGFR          | amplification | 7q31.2   |
| MYC           | amplification | 8q24.21  |
| MYC           | amplification | 8p12     |
| MYC           | amplification | 8q21.11  |
| CCND1         | amplification | 11q13.3  |
| CCND1         | amplification | 11q22.3  |
| CCND1         | amplification | 11p13    |
| ARNTL2, KRAS  | amplification | 12p11.23 |
| KRAS          | amplification | 12q14.1  |
| KRAS          | amplification | 12q12    |
| KRAS          | amplification | 12q14.3  |
| MBIP, TTF1    | amplification | 14q13.3  |
| TTF1          | amplification | 17q21.1  |
| MAPK4K1       | amplification | 19q13.2  |
| MAPK4K1       | amplification | 19q13.31 |
| MAPK4K1       | amplification | 19q13.11 |
| MAPK4K1       | amplification | 20q11.22 |
| MAPK4K1       | amplification | 20q11.21 |
| MAPK4K1       | amplification | 20q13.33 |
| MAPK4K1       | amplification | 22q12.1  |
| CRKL, PIK4CA  | amplification | 22q11.21 |
| PIK4CA        | amplification | 22q11.21 |
| LRP1B         | deletion      | 2q22.1   |
| FHIT          | deletion      | 3p14.2   |
| FHIT          | deletion      | 3p14.2   |
| FHIT          | deletion      | 3q13.31  |
| FHIT          | deletion      | 3p26.1   |
| FHIT          | deletion      | 3p14.2   |
| FHIT          | deletion      | 4q22.1   |
| FHIT          | deletion      | 4q24.3   |
| FHIT          | deletion      | 6q25.3   |
| FHIT          | deletion      | 6q22.31  |
| EPHA7         | deletion      | 6q16.1   |
| CSDM1         | deletion      | 9p23.3   |
| CSDM1         | deletion      | 9p12     |
| CDKN2A/CDKN2B | deletion      | 12q13    |
| PTPRD         | deletion      | 10p23    |
| PTPRD         | deletion      | 10q13    |
| PTPRD         | deletion      | 10q13    |
| PTPRD         | deletion      | 10q14    |
| PTPRD         | deletion      | 10q21.1  |
| PTPRD         | deletion      | 11q14.1  |
| PTPRD         | deletion      | 11p12    |
| PTPRD         | deletion      | 12q13.11 |
| PTPRD         | deletion      | 12p12.1  |
| PTPRD         | deletion      | 13q21.1  |
| PTPRD         | deletion      | 13q12.11 |
| PTPRD         | deletion      | 16q23.1  |
| PTPRD         | deletion      | 17p12    |
| PTPRD         | deletion      | 18q22.3  |
| PTPRD         | deletion      | 18q12.1  |
| PTPRD         | deletion      | 18q12.3  |
| PTPRD         | deletion      | 20p12.2  |
| PTPRD         | deletion      | 20p11.22 |
| PTPRD         | deletion      | 21q11.2  |
| PTPRD         | deletion      | 21q21.1  |

| Lesion         | Lesion Type   | Copy Number |
|----------------|---------------|-------------|
| RAB13, ARNT    | amplification | 1q21.3      |
| PKC3CA         | amplification | 1p22.1      |
| TERT           | amplification | 3p21.2      |
| 9p11           | amplification | 9p13.3      |
| TTRIO          | amplification | 9p11        |
| 9p14.3         | amplification | 9p14.3      |
| 9q21.2         | amplification | 9q21.2      |
| EGFR           | amplification | 7p11.2      |
| 7p22.3         | amplification | 7p22.3      |
| 7q31.2         | amplification | 7q31.2      |
| MYC            | amplification | 8q24.21     |
| 9p12           | amplification | 9p12        |
| 9q21.11        | amplification | 9q21.11     |
| CCND1          | amplification | 11q13.3     |
| 11q22.3        | amplification | 11q22.3     |
| 11p13          | amplification | 11p13       |
| ARNTL2, KRAS   | amplification | 12p11.23    |
| 12q14.1        | amplification | 12q14.1     |
| 12q12          | amplification | 12q12       |
| 12q14.3        | amplification | 12q14.3     |
| MBIP, TITF1    | amplification | 14q13.3     |
| 17q21.1        | amplification | 17q21.1     |
| MAPK4K1        | amplification | 19q13.2     |
| 19q13.31       | amplification | 19q13.31    |
| 19q13.11       | amplification | 19q13.11    |
| 20q11.22       | amplification | 20q11.22    |
| 20q11.21       | amplification | 20q11.21    |
| 20q13.33       | amplification | 20q13.33    |
| 22q12.1        | amplification | 22q12.1     |
| CRKL, PKC3CA   | amplification | 22q11.21    |
| LRP1B          | deletion      | 2q22.1      |
| FH1T           | deletion      | 3p14.2      |
| FH1T           | deletion      | 3p14.2      |
| 3q13.31        | deletion      | 3q13.31     |
| 3p26.1         | deletion      | 3p26.1      |
| FH1T           | deletion      | 3p14.2      |
| 4q22.1         | deletion      | 4q22.1      |
| 4q34.3         | deletion      | 4q34.3      |
| 6q25.3         | deletion      | 6q25.3      |
| 6q22.31        | deletion      | 6q22.31     |
| EPHA7          | deletion      | 6q16.1      |
| C5MD1          | deletion      | 9p23.3      |
| 9p12           | deletion      | 9p12        |
| CDKN2A/ CDKN2B | deletion      | 9q21.3      |
| PTPRD          | deletion      | 9p23        |
| 9q21.3         | deletion      | 9q21.3      |
| 9q24.3         | deletion      | 9q24.3      |
| 10p14          | deletion      | 10p14       |
| 10q21.1        | deletion      | 10q21.1     |
| 11q14.1        | deletion      | 11q14.1     |
| 11p12          | deletion      | 11p12       |
| 12q13.11       | deletion      | 12q13.11    |
| 12q12.1        | deletion      | 12q12.1     |
| 13q21.1        | deletion      | 13q21.1     |
| 13q12.11       | deletion      | 13q12.11    |
| 16q23.1        | deletion      | 16q23.1     |
| 17p12          | deletion      | 17p12       |
| 18q22.3        | deletion      | 18q22.3     |
| 18q12.1        | deletion      | 18q12.1     |
| 18q12.3        | deletion      | 18q12.3     |
| 20p11.22       | deletion      | 20p11.22    |
| 20p11.2        | deletion      | 20p11.2     |
| 21q21.1        | deletion      | 21q21.1     |

| Lesion        | Lesion Type   | Cytoband |
|---------------|---------------|----------|
| RAB13, ARNT   | amplification | 1q21.3   |
| PK3CA         | amplification | 12p21.1  |
| TERT          | amplification | 5p13.33  |
| TTRIO         | amplification | 9p11     |
| EGFR          | amplification | 8q21.2   |
| EGFR          | amplification | 7p11.2   |
| EGFR          | amplification | 7q22.3   |
| EGFR          | amplification | 7q31.2   |
| MYC           | amplification | 8q24.21  |
| MYC           | amplification | 8p12     |
| MYC           | amplification | 8q21.11  |
| CCND1         | amplification | 11q13.3  |
| CCND1         | amplification | 11q22.3  |
| CCND1         | amplification | 11p13    |
| ARNTL2, KRAS  | amplification | 12p12.3  |
| KRAS          | amplification | 12q14.1  |
| KRAS          | amplification | 12q12    |
| KRAS          | amplification | 12q14.3  |
| MBIP, TTF1    | amplification | 14q13.3  |
| TTF1          | amplification | 17q21.1  |
| MAPK4K1       | amplification | 19q13.2  |
| MAPK4K1       | amplification | 19q13.31 |
| MAPK4K1       | amplification | 19q13.11 |
| MAPK4K1       | amplification | 20q11.22 |
| MAPK4K1       | amplification | 20q11.21 |
| MAPK4K1       | amplification | 20q13.33 |
| MAPK4K1       | amplification | 22q12.1  |
| CRKL, PIK4CA  | amplification | 22q11.21 |
| PIK4CA        | amplification | 22q11.21 |
| LRP1B         | deletion      | 2q22.1   |
| FHIT          | deletion      | 9p14.2   |
| FHIT          | deletion      | 9p14.2   |
| FHIT          | deletion      | 9q13.31  |
| FHIT          | deletion      | 9q26.1   |
| FHIT          | deletion      | 9p14.2   |
| FHIT          | deletion      | 4q22.1   |
| FHIT          | deletion      | 4q24.3   |
| FHIT          | deletion      | 6q25.3   |
| FHIT          | deletion      | 6q22.31  |
| EPHA7         | deletion      | 6q16.1   |
| CSDM1         | deletion      | 9p23.3   |
| CSDM1         | deletion      | 9p12     |
| CDKN2A/CDKN2B | deletion      | 12q13    |
| CDKN2B        | deletion      | 12q13    |
| PTPRD         | deletion      | 9q21.3   |
| PTPRD         | deletion      | 9q21.3   |
| PTPRD         | deletion      | 9q24.3   |
| PTPRD         | deletion      | 10p14    |
| PTPRD         | deletion      | 10q21.1  |
| PTPRD         | deletion      | 11q14.1  |
| PTPRD         | deletion      | 11p12    |
| PTPRD         | deletion      | 12q13.11 |
| PTPRD         | deletion      | 12q12.1  |
| PTPRD         | deletion      | 13q21.1  |
| PTPRD         | deletion      | 13q12.11 |
| PTPRD         | deletion      | 16q23.1  |
| PTPRD         | deletion      | 17p12    |
| PTPRD         | deletion      | 18q22.3  |
| PTPRD         | deletion      | 18q12.1  |
| PTPRD         | deletion      | 18q12.3  |
| PTPRD         | deletion      | 20p12.2  |
| PTPRD         | deletion      | 20p11.22 |
| PTPRD         | deletion      | 21q11.2  |
| PTPRD         | deletion      | 21q21.1  |







**Supplemental Table 4: Regions targeted by homozygous deletions and by LOH**

|                             | Cytoband <sup>1</sup>         | Wide Peak Region<br>NSCLC cell lines | # of Samples            | Gene in/near region <sup>2</sup>  | Minimum copy<br>number in NSCLC<br>cell lines | Minimum copy<br>number in primary<br>tumors |  |
|-----------------------------|-------------------------------|--------------------------------------|-------------------------|-----------------------------------|-----------------------------------------------|---------------------------------------------|--|
| <b>Homozygous deletions</b> | 2q22.1-22.2                   | 141,736,502-141,981,932              | 7                       | <i>LRP1B</i>                      | 0.24                                          | 1.09                                        |  |
|                             | 3p14.2                        | 60,497,972-60,531,766                | 5                       | <i>FHIT</i>                       | 0.2                                           | 1.17                                        |  |
|                             | 6q22.1                        | 116,395,976-116,485,756              | 1                       | <i>FRK</i>                        | 0.6                                           | 1.18                                        |  |
|                             | 6q22.31                       | 124,304,070-124,859,632              | 1                       | <i>TCBA1</i>                      | 0.59                                          | 0.99                                        |  |
|                             | 6q25.3                        | 753,660-1,822,957                    | 1                       | <i>FOXF2, FOXC1</i>               | 0.28                                          | 1.18                                        |  |
|                             | 9p21.3                        | 21,555,232-23,372,509                | 29                      | <i>CDKN2A, B/MTAP</i>             | 0.36                                          | 1                                           |  |
|                             | 9p21.3                        | 22,007,836-22,078,260                | 1                       | <i>MTAP</i>                       | 0.35                                          | 0.72                                        |  |
|                             | 9p23-p24.3                    | 8,852,626-9,455,327                  | 3                       | <i>PTPRD</i>                      | 0.83                                          | 1.2                                         |  |
|                             | 12p13.32                      | 3,560,815-3,941,530                  | 1                       | <i>PARP11</i>                     | 0.31                                          | 1.1                                         |  |
|                             | 13q12.11                      | 18,450,473-19,585,127                | 2                       | <i>TUBA2, TPTE2</i>               | 0.23                                          | 1.22                                        |  |
|                             | 13q12.11                      | 20,468,202-20,533,722                | 1                       | <i>LATS2</i>                      | 0.18                                          | 1.08                                        |  |
|                             | 16q23.1                       | 77,146,480-77,118,617                | 2                       | <i>WWOX</i>                       | 0.45                                          | 1.34                                        |  |
|                             | 19p13.2                       | 11,020,096-11,088,326                | 1                       | <i>SMARCA4</i>                    | 0.63                                          | 1.07                                        |  |
|                             | 21q11.2                       | 14,404,476-20,812,000                | 3                       | <i>SAMSN1</i>                     | 0.24                                          | 1.14                                        |  |
|                             | <b>Loss of heterozygosity</b> | 1p13.2                               | 112,799,001-114,907,999 | 36                                | <i>ST7L</i>                                   |                                             |  |
|                             |                               | 3p21.31                              | 41,524,901-43,273,999   | 44                                |                                               |                                             |  |
| 4q31.21                     |                               | 99,042,901-100,717,999               | 30                      | <i>TSPAN5</i>                     |                                               |                                             |  |
| 5q23.2                      |                               | 122,397,001-123,313,999              | 37                      |                                   |                                               |                                             |  |
| 6q21                        |                               | 105,555,001-106,650,999              | 40                      |                                   |                                               |                                             |  |
| 8p21.3                      |                               | 17,440,601-18,487,599                | 49                      | <i>PDGFRL, MTUS1, FGL1</i>        |                                               |                                             |  |
| 9p22.3                      |                               | 13,716,301-15,107,499                | 62                      |                                   |                                               |                                             |  |
| 11p15.1                     |                               | 1-4,079,699                          | 30                      | <i>CDKN1C, LRDD, SIRT3; NLRP6</i> |                                               |                                             |  |
| <sup>3</sup> 12p13.2        |                               | 11,738,201-12,194,199                | 43                      | <i>BCL2L14</i>                    |                                               |                                             |  |
| 13q13.3                     |                               | 23,906,601-27,615,399                | 51                      | <i>CDK8, RNF6</i>                 |                                               |                                             |  |
| 15q15.1                     |                               | 38,817,001-39,299,099                | 41                      |                                   |                                               |                                             |  |
| <sup>3</sup> 17p13.3        |                               | 1,967,741-3,996,889                  | 69                      | <i>TP53</i>                       |                                               |                                             |  |
| 18q21.32                    |                               | 54,111,701-55,096,399                | 46                      | <i>BCL2L12</i>                    |                                               |                                             |  |
| 19p13.3                     |                               | 3,713,121-6,214,499                  | 60                      | <i>MATK, DAPK3, PIAS4, UHRF1</i>  |                                               |                                             |  |
| 20p11.23                    |                               | 17,969,501-18,745,999                | 39                      |                                   |                                               |                                             |  |
| 21q21.2                     |                               | 24,377,801-25,990,799                | 36                      |                                   |                                               |                                             |  |
| <sup>3</sup> 22q12.1        | 25,299,301-25,721,399         | 42                                   | <i>SEZ6L</i>            |                                   |                                               |                                             |  |

<sup>1</sup> based on hg17 human genome assembly

<sup>2</sup> selected genes in region encode putative tumor suppressor proteins and proteins involved in cell growth, cell cycle regulation and induction of apoptosis

<sup>3</sup> copy neutral events





**Supplemental Table 6: gene expression signature of EGFR mutated cell lines**

| probe set    | gene                                                                                             | Accession  | fold change | difference of means | P value  |
|--------------|--------------------------------------------------------------------------------------------------|------------|-------------|---------------------|----------|
| Z000008_s.at | GDP dissociation inhibitor 2                                                                     | D13968     | 2           | 365.37              | 0.00015  |
| Z000052_s.at | interleukin enhancer binding factor 2, 45kD                                                      | NM_004515  | 2.1         | 541.05              | 0.000008 |
| Z5202.at     | hydroxyethyl protein MG22821                                                                     | AA022435   | -2.47       | -209.2              | 0.006553 |
| Z001598.at   | LYX1860 protein                                                                                  | AA022432   | -2.48       | -208.79             | 0.000002 |
| Z000604_s.at | protein kinase, cAMP-dependent, regulatory, type I, alpha (tissue specific extrajumper 1)        | AI632338   | 3.8         | 1004.25             | 0.000001 |
| Z000607_s.at | RAD21 homolog (S. pombe)                                                                         | M13468     | 3.17        | 300.05              | 0.000009 |
| Z000637_s.at | tyrosine tyrosine phosphatase, receptor type F                                                   | BC628967   | 2.83        | 404.19              | 0.002722 |
| Z000641_s.at | tyrosine 3-monooxygenase/tyrosinase/tyrosinase activation protein, zeta polypeptide              | AF762627   | 2.77        | 188.46              | 0.000158 |
| Z000659_s.at | DM1 (NSP40) homolog, subfamily B, member 1                                                       | U23964     | 2.13        | 1109.11             | 0.00012  |
| Z000679_x.at | high-mobility group (HMG) domain, transcriptional corepressor 1                                  | NM_0013128 | 2.13        | 219.35              | 0.000452 |
| Z000722_s.at | membrane component, chromosome 11, surface marker 1                                              | BC511760   | 2.59        | 672.87              | 0.000001 |
| Z000730_s.at | protein tyrosine phosphatase type IVa, member 1                                                  | BC525784   | 2.13        | 232.16              | 0.000442 |
| Z000745_s.at | protein tyrosine phosphatase (G protein), beta polypeptide 1                                     | BC576710   | 2.88        | 187.82              | 0.000044 |
| Z000758_x.at | calyculin A phosphodiesterase II, alpha                                                          | AF076603   | 3.16        | 470.96              | 0.000230 |
| Z000841_s.at | glutathione S-transferase Kappa synthetase                                                       | U026591    | 2.38        | 228.81              | 0.000546 |
| Z000852_s.at | guanine nucleotide binding protein (G protein), beta polypeptide 2                               | AI426272   | -2.01       | -181.823            | 0.002722 |
| Z000900_s.at | mannose-6-phosphate receptor (GlcNAc dependent)                                                  | NM_005273  | 2.04        | 100.42              | 0.000001 |
| Z000920_s.at | B-cell translocation gene 1, anti-proliferative                                                  | AI583537   | 8.89        | 642.73              | 0.000175 |
| Z000927_s.at | KDEL (Yps4sp-Glc-1eu) endoplasmic reticulum protein retention receptor 1                         | AI535380   | 2.8         | 393.44              | 0.000091 |
| Z000976_s.at | Interleukin 13                                                                                   | NM_006801  | 1.68        | 196.15              | 0.001342 |
| Z000982_s.at | annexin A6                                                                                       | NM_006624  | -2.01       | -181.823            | 0.002722 |
| Z001008_s.at | thioredoxin interacting protein                                                                  | NM_0011155 | 3.14        | 167.04              | 0.008404 |
| Z01040.at    | guanine nucleotide binding protein (G protein), alpha inhibiting activity polypeptide 2          | AA412232   | 6.97        | 179.07              | 0.003001 |
| Z01045_s.at  | putative human H. A class I associated protein 1                                                 | NM_002070  | 2.05        | 188.7               | 0.000379 |
| Z01104_x.at  | hypothetical protein                                                                             | NM_0056505 | 2.73        | 165.88              | 0.000111 |
| Z01118.at    | phosphoglucosyltransferase                                                                       | NM_015383  | 2.73        | 529.71              | 0.000020 |
| Z01123_s.at  | epididymal translocation initiation factor 5A                                                    | NM_002631  | 2.6         | 586.55              | 0.00004  |
| Z01131_s.at  | cathepsin 1, type 1, E-cadherin (epithelial)                                                     | NM_004360  | -2.14       | -1131.33            | 0.000691 |
| Z01167_x.at  | Rho GDP dissociation inhibitor (GDI) alpha                                                       | D13969     | 16.74       | 121.35              | 0.000452 |
| Z01211_s.at  | DEAD/DF (Asp-Glu-Ala-Gly) box polypeptide 3                                                      | AI47713    | 2.96        | 138.01              | 0.000147 |
| Z01224_s.at  | serine arginine repetitive matrix 1                                                              | NM_002654  | 2.06        | 167.09              | 0.000084 |
| Z01251.at    | pyruvate kinase, muscle                                                                          | AI768845   | 2.28        | 361.66              | 0.000341 |
| Z01259_s.at  | sva retrovirus-like protein                                                                      | Z48199     | -2.21       | -162.341            | 0.000822 |
| Z01266.at    | sva retrovirus-like protein                                                                      | AF076702   | -2.41       | -200.972            | 0.000012 |
| Z01337_s.at  | guanine nucleotide binding protein 3 (cellular)                                                  | NM_004784  | 3.06        | 164.56              | 0.000939 |
| Z01348.at    | guanine nucleotide binding protein 3 (cellular)                                                  | NM_002084  | 2.47        | 190.23              | 0.000121 |
| Z01376_s.at  | ubiquitin carboxyl-terminal esterase L1 (ubiquitin thioesterase)                                 | AI591354   | 2.23        | 188.98              | 0.000804 |
| Z01392_s.at  | histone H4                                                                                       | BC531974   | 10.69       | 1747.63             | 0.000261 |
| Z01456.at    | RB33 binding unlinked by benzimidazoles 3 homolog (yasa)                                         | AF076702   | 3.2         | 117.29              | 0.000261 |
| Z01456.at    | NAADPH dehydrogenase, quinone 1                                                                  | AI160695   | 2.08        | 188.27              | 0.006878 |
| Z01476_s.at  | ribonucleotide reductase M1 polypeptide                                                          | AI625974   | 2.11        | 639.63              | 0.004103 |
| Z01485_s.at  | reticulocalbin 2, E3-hand calcium binding domain                                                 | AI625974   | 2.74        | 121.21              | 0.000003 |
| Z01490_s.at  | perforin 1                                                                                       | BC004892   | 2.28        | 324.73              | 0.006623 |
| Z0151_s.at   | Rhesus erythrocyte protein S-spectrin-binding protein                                            | NM_005729  | 3.08        | 275.23              | 0.001502 |
| Z0151_s.at   | Rhesus erythrocyte protein S-spectrin-binding protein                                            | U02628     | 2.6         | 227.04              | 0.001623 |
| Z01565_s.at  | inhibitor of DNA binding 2, dominant negative helix-loop-helix protein                           | NM_002166  | 3.55        | 324.73              | 0.000891 |
| Z01635_s.at  | nuclear phosphoprotein similar to S. cerevisiae Pwp1                                             | BF796924   | 2.02        | 122.37              | 0.000004 |
| Z01645.at    | heparanin (heparan C, cytochrome)                                                                | AF90766    | 3.49        | 261.9               | 0.000004 |
| Z01740.at    | ubiquitin-conjugating enzyme E2, ubiquitin variant M1 (oncogene)                                 | NM_002160  | -5.76       | -465.45             | 0.000083 |
| Z01742_x.at  | splicing factor, arginine/serine-rich 1 (splicing factor 2, alternative splicing factor)         | BC109153   | 2.81        | 302.69              | 0.000018 |
| Z01813_s.at  | KIAA0210 gene product                                                                            | NM_005924  | 3.2         | 443.92              | 0.000010 |
| Z01841_s.at  | heat shock 27kD protein 1                                                                        | AI654161   | 2.94        | 147.48              | 0.000001 |
| Z01869_s.at  | translucan (beta-1)                                                                              | NM_001540  | -2.13       | -227.362            | 0.000792 |
| Z01916_s.at  | glucuronidase (beta-1)                                                                           | BF539392   | 2.04        | 113.21              | 0.001152 |
| Z01968.at    | thyroid hormone receptor-associated protein, 40k kDa subunit                                     | AF148382   | 1.49        | 301.05              | 0.000262 |
| Z02118_s.at  | cornein III                                                                                      | AF011165   | 2.52        | 161.62              | 0.000003 |
| Z02205.at    | vesicolarin-stimulated phosphoprotein                                                            | AA541758   | 2.75        | 135.17              | 0.000018 |
| Z02388_s.at  | TRAM-like protein                                                                                | NM_003370  | 2.4         | 102.4               | 0.001096 |
| Z02388_s.at  | TRAM-like protein                                                                                | AB86461    | 2.08        | 107.56              | 0.000341 |
| Z02435_s.at  | cytochrome P450, subfamily 1 (cyp19c1-inducible), polypeptide 1 (gladsonia S. rimovii infantile) | NM_005426  | 3.38        | 212.68              | 0.000355 |
| Z02435_s.at  | cytochrome P450, subfamily 1 (cyp19c1-inducible), polypeptide 1 (gladsonia S. rimovii infantile) | AI154504   | 2.45        | 184.38              | 0.002541 |
| Z02548_s.at  | glutathione S-transferase M3 (brain)                                                             | NM_002882  | 2.94        | 791.96              | 0.000001 |
| Z02554_s.at  | neuronal protein 215                                                                             | AI527430   | 2.25        | 425.8               | 0.004811 |
| Z02847_s.at  | U6 snRNA-associated small protein                                                                | NM_002524  | 2.31        | 111.25              | 0.000692 |
| Z02844_s.at  | triala binding protein 2 (beta3 isoform)                                                         | FA113503   | 2.43        | 243.61              | 0.000259 |
| Z02855_s.at  | solute carrier family 16 (monocarboxylic acid transporters), member 3                            | AI025261   | 3.65        | 113.43              | 0.000009 |
| Z02975_s.at  | KIAA078 protein                                                                                  | AI513917   | 7.43        | 350.39              | 0.000271 |
| Z03007_x.at  | lysosomal-associated membrane protein 2                                                          | N21138     | 2.6         | 154.35              | 0.000838 |
| Z03007_x.at  | lysosomal-associated membrane protein 2                                                          | AF077198   | 5.13        | 203.91              | 0.005304 |
| Z03085_s.at  | transforming growth factor, beta 1                                                               | NM_002294  | -2.64       | -446.59             | 0.000002 |
| Z03109.at    | ubiquitin-conjugating enzyme E2M (UBC2, yeast)                                                   | BC000125   | 3.92        | 240.42              | 0.000028 |
| Z03109.at    | ubiquitin-conjugating enzyme E2M (UBC2, yeast)                                                   | NM_003569  | 2.22        | 293.9               | 0.000058 |

| probe set   | gene                                                                                                     | accession | fold change | difference of means | P value  |
|-------------|----------------------------------------------------------------------------------------------------------|-----------|-------------|---------------------|----------|
| Z03148_s_at | tissue mrfc-containing 14                                                                                | NM_014788 | -2.36       | -256.14             | 0.003359 |
| Z03173_s_at | hypothetical protein                                                                                     | AY068019  | -2.89       | -383.29             | 0.005509 |
| Z03186_s_at | S100 calcium binding protein A4 (calcium protein, calvaculin, murine placental homolog)                  | NM_002961 | 3.84        | 556.29              | 0.005343 |
| Z03277_s_at | DNA fragmentation factor 45 (DFF45)                                                                      | NM_004401 | 2.17        | 122.21              | 0.00019  |
| Z03291_at   | Ccd4-NO1 transcription complex, subunit 4                                                                | NM_013316 | -1.4832     | -148.82             | 0.005522 |
| Z03470_s_at | pleckstrin                                                                                               | NM_043595 | 2.41        | 189.96              | 0.001622 |
| Z03497_s_at | PPAR binding protein                                                                                     | NM_004774 | 2.22        | 137.99              | 0.00483  |
| Z03544_at   | geranylgeranyl-halobutyl anionophore (atropin-1)                                                         | U42924    | 4.08        | 429.2               | 0.000493 |
| Z03925_s_at | histone H2A, constitutive                                                                                | NM_002604 | 2.49        | 437.22              | 0.000185 |
| Z04004_at   | PRK3, apoptosis, W71, regulator                                                                          | A336206   | 3.26        | 331.65              | 0.00025  |
| Z04014_at   | distal specificity phosphatase 4                                                                         | NM_001394 | 4.14        | 259.16              | 0.00232  |
| Z04015_s_at | distal specificity phosphatase 4                                                                         | BC026671  | 2.84        | 260.65              | 0.000526 |
| Z04022_at   | Nedd4-like ubiquitin-protein ligase                                                                      | AK68780   | -2.09       | -198.48             | 0.00316  |
| Z04151_s_at | glucuronidase 1, cytosolic, type I, member C1 (glucuronidyl dehydrogenase 1, 20-alpha (3-alpha)-hydroxy- | NM_001533 | 5.77        | 1732.75             | 0.000857 |
| Z04254_s_at | vitamin D (1,25-dihydroxyvitamin D3) receptor                                                            | NM_000376 | 4.22        | 416.75              | 0.002451 |
| Z04255_s_at | vitamin D (1,25-dihydroxyvitamin D3) receptor                                                            | AA772285  | -4.66       | -189.51             | 0.000337 |
| Z04308_s_at | KIAA0329 gene product                                                                                    | NM_014844 | -2.18       | -160.319            | 0.004319 |
| Z04344_s_at | Shee23 homolog A (S. cerevisiae)                                                                         | NM_005344 | 3.49        | 103.28              | 0.00062  |
| Z04352_s_at | UDP-glucanase 1, cytosolic                                                                               | NM_028114 | 1.18        | 259.36              | 0.00026  |
| Z04427_s_at | concentin vesicle membrane protein                                                                       | NM_006815 | 6.75        | 448.61              | 0.000001 |
| Z04466_s_at | synuclein alpha (non A4 component of amyloid precursor)                                                  | BC260394  | 5.94        | 133.66              | 0.001881 |
| Z04491_at   | phosphodiesterase 4D, cAMP-specific (phosphodiesterase E3 quince homolog, Diosophila)                    | IK0917    | 174.58      | 174.58              | 0.008435 |
| Z04532_x_at | UDP-glucanase 1, cytosolic                                                                               | NM_021027 | 2.09        | 4                   | 0.004433 |
| Z04561_at   | UDP-galactose 4-epimerase                                                                                | AF154830  | 7.97        | 268.61              | 0.001368 |
| Z04581_s_at | UDP-glucose ceramide diacyltransferase                                                                   | NM_003358 | 46.99       | 326.49              | 0.000792 |
| Z04920_at   | carbamoyl-phosphate synthetase 1, mitochondrial                                                          | AF154830  | 7.97        | 718.97              | 0.001092 |
| Z04989_s_at | myoxvirus (Influenza) resistance 2, homolog of murine                                                    | BC305661  | 4.74        | 136.38              | 0.008603 |
| Z04994_at   | retinol factor 1 (lipase carrier, estrogen-inducible, scapina expressed in)                              | NM_002443 | -2.82       | -260.15             | 0.009054 |
| Z05009_at   | retinol factor 1 (lipase carrier, estrogen-inducible, scapina expressed in)                              | NM_002443 | 11.43       | 792.58              | 0.002255 |
| Z05229_s_at | calculation factor C (Lentivirus polyomavirus homolog), cophilin                                         | AA693336  | 6.2         | 241.97              | 0.000721 |
| Z05321_at   | elastinolytic transglutinin inhibitor factor 2, subunit 3 (gamma, SKD)                                   | NM_001415 | 4.51        | 201.61              | 0.002109 |
| Z05368_at   | carbamoyl 9                                                                                              | NM_020980 | 2.07        | 426.93              | 0.001711 |
| Z05653_at   | carbamoyl 9                                                                                              | NM_001911 | -2.9089     | -527.02             | 0.001227 |
| Z05656_s_at | CD85 antigen (CD28 antigen ligand 2, B7-2 antigen)                                                       | NM_008989 | 3.62        | 240.78              | 0.000077 |
| Z05808_at   | agglutinin beta-hydroxylase                                                                              | NM_004318 | 12.28       | 120.07              | 0.000034 |
| Z05967_at   | H4 histone family, member G                                                                              | NM_003542 | 6.69        | 378.22              | 0.001394 |
| Z06057_x_at | Sarboiprom (qpl, H5, leukosialin, CD43)                                                                  | NM_003173 | 2.43        | 274.89              | 0.005599 |
| Z06094_x_at | UDP-glucosyltransferase 1 family, polypeptide A6                                                         | NM_001072 | 6.57        | 426.09              | 0.006864 |
| Z06200_at   | UDP-glucosyltransferase 1 family, polypeptide A6                                                         | NM_001072 | 5.82        | 260.38              | 0.009477 |
| Z06245_s_at | histone H2B, constitutive                                                                                | NM_000475 | 6.03        | 161.32              | 0.002616 |
| Z07062_at   | islet amyloid polypeptide, group B, member 1                                                             | NM_000415 | 2.24        | 247.66              | 0.000505 |
| Z07138_at   | P4D finger protein 2                                                                                     | NM_003592 | 2.99        | 976.4               | 0.000465 |
| Z07657_x_at | karvobrenin (limpoin) beta 2                                                                             | NM_002270 | 2.22        | 287.11              | 0.00006  |
| Z07931_s_at | fructose-6-phosphate-2-fructose-6-phosphatase 2                                                          | NM_002412 | -2.02       | -418.54             | 0.000454 |
| Z08078_s_at | transcription factor 8 (repress, interferon 1 expression)                                                | NM_030751 | 4.45        | 556.1               | 0.000416 |
| Z08091_s_at | thioredoxin protein DKF2654K18.22                                                                        | NM_030755 | -3.16       | -1729.38            | 0.003017 |
| Z08097_s_at | thioredoxin domain-containing                                                                            | NM_030755 | 2.48        | 172.54              | 0.000443 |
| Z08132_x_at | H4A8 associated transcript 2                                                                             | NM_004638 | 2.49        | 227.18              | 0.000003 |
| Z08353_s_at | FRS3 binding protein 8 (FRS3)                                                                            | NM_012181 | 2.11        | 224.72              | 0.000205 |
| Z08380_s_at | HM kinase homolog                                                                                        | NM_012181 | 2.27        | 140.15              | 0.003887 |
| Z08393_x_at | conformation releasing hormone receptor 1                                                                | NM_004382 | -11.27      | -203.67             | 0.005077 |
| Z08621_s_at | protein tyrosine phosphatase type IVA, member 2                                                          | BC795101  | 2.71        | 295.57              | 0.000817 |
| Z08624_s_at | elastinolytic transglutinin inhibitor factor 4 gamma 1                                                   | BC965878  | 2.81        | 171.17              | 0.000433 |
| Z08633_s_at | hyaluronan synthase 2, cytosolic, beta subunit (hyaluronan synthase 2, cytosolic)                        | BC61032   | 2.33        | 271.38              | 0.003035 |
| Z08661_s_at | tetratricopeptide repeat domain 3                                                                        | AW510696  | 3.97        | 128.22              | 0.000003 |
| Z08662_s_at | tetratricopeptide repeat domain 3                                                                        | AB853338  | 2.56        | 332.05              | 0.000007 |
| Z08677_s_at | lysine (Lys) blood group 2                                                                               | AL550657  | 2.63        | 567.71              | 0.000131 |
| Z08683_x_at | homodomain-containing 2                                                                                  | AA902787  | 2.35        | 350.67              | 0.000114 |
| Z08750_x_at | Kelch repeat domain 1                                                                                    | BC965878  | 2.38        | 532.95              | 0.000016 |
| Z08754_s_at | histoneone assembly protein 1-like 1                                                                     | AL162068  | 2.19        | 212.92              | 0.000033 |
| Z08765_s_at | histoneone assembly protein 1-like 1                                                                     | NM_005828 | 2.79        | 471.25              | 0.00001  |
| Z08794_s_at | histoneone nuclear ribonucleoprotein R                                                                   | NM_025915 | 15.66       | 550.91              | 0.004663 |
| Z08823_s_at | SWI/SNF related, matrix associated, actin dependent regulator of chromatin, subfamily a, member 4        | NF28196   | -2.83       | -617.05             | 0.001445 |
| Z08825_s_at | chromosome 3 open reading frame 4                                                                        | AF184799  | 4.33        | 866.06              | 0.000416 |
| Z08925_s_at | chromosome 3 open reading frame 4                                                                        | AF184799  | 2.11        | 152.78              | 0.000165 |
| Z08962_s_at | stomatal anion channel 1                                                                                 | BC540552  | 2.18        | 241.96              | 0.000301 |
| Z09023_x_at | nuclear receptor subfamily 2, group F, member 2                                                          | BC001765  | 2.28        | 184.96              | 0.000332 |
| Z09160_at   | histone H2B, constitutive                                                                                | AK68780   | 2.07        | 233.18              | 0.002035 |
| Z09161_at   | histone H2B, constitutive                                                                                | AK68780   | 4.74        | 942.01              | 0.000909 |
| Z09185_s_at | histone H2B, constitutive                                                                                | AK68780   | 2.74        | 460.310             | 0.001255 |
| Z09278_s_at | tissue factor pathway inhibitor 2                                                                        | L27624    | 2.03        | 866.25              | 0.004473 |
| Z09344_at   | tissue factor pathway inhibitor 2                                                                        | BC002827  | 2.5         | 192.32              | 0.000495 |
| Z09372_x_at | ubiquitin, beta polypeptide                                                                              | BC971587  | 2.72        | 126.5               | 0.000488 |

| probe set   | gene                                                                                                | Accession | fold change | difference of means | P value   |
|-------------|-----------------------------------------------------------------------------------------------------|-----------|-------------|---------------------|-----------|
| 209385_s.at | proline synthetase co-transcribed (bacterial homolog)                                               | AIJ36816  | 2.98        | 104.93              | 0.000132  |
| 209389_x.at | adipocyte reductase family 1, member C2 (dihydrodiol dehydrogenase 2, bile acid binding protein-3a) | U05598    | 1.18        | 1904.79             | 0.000226  |
| 209394_s.at | hypoxanthine phosphoribosyl transferase                                                             | AF13662   | 5.14        | 130.11              | 0.000411  |
| 209875_s.at | secreted phosphoprotein 1 (osteopontin, home salivaprotein, ebf1, Ectoplyctice activation 1)        | U65248    | 23.88       | 647.47              | 0.004879  |
| 209895_s.at | hypoxanthine phosphoribosyl transferase                                                             | AF119855  | 3.4         | 106.25              | 0.000027  |
| 209896_s.at | hypoxanthine phosphoribosyl transferase                                                             | AF119855  | 3.01        | 239.56              | 0.000023  |
| 209912_s.at | KIAA0415 gene product                                                                               | AB374854  | -2.83       | -103.32             | 0.007121  |
| 209942_s.at | methionine adenosyl transferase                                                                     | BC000340  | 4.72        | 894.69              | 0.002216  |
| 210184_s.at | ECGF1 (secreted phosphoprotein 1, 220)                                                              | BC000340  | 4.72        | 894.69              | 0.002216  |
| 210185_s.at | ECGF1 (secreted phosphoprotein 1, 220)                                                              | BC000340  | 4.72        | 894.69              | 0.002216  |
| 210225_x.at | hepatocyte immunoglobulin-like receptor, subfamily B (with TM and ITM domain), member 3             | BC005147  | 3.16        | 230.29              | 0.000023  |
| 210316_at   | transcript 2, rat receptor-bound protein 10                                                         | U43143    | -12.92      | -342.25             | 0.0000019 |
| 210317_s.at | lysine 3-monoxygenase/hydroxylase 5-monoxygenase activation protein, avian polyprotein              | U29346    | 5.07        | 693.61              | 0.000005  |
| 210334_x.at | lysine 3-monoxygenase/hydroxylase 5-monoxygenase activation protein, avian polyprotein              | AB028869  | 3.49        | 362.53              | 0.000001  |
| 210347_s.at | ATC domain protein kinase catalytic, rat polyprotein                                                | BC006471  | 2.84        | 161.82              | 0.000078  |
| 210438_x.at | Spermin synthase antigen A2 (GMD, demodiprotein and antigen S5A/MD)                                 | M25077    | 2.68        | 165.58              | 0.000151  |
| 210457_x.at | high-mobility group (nonhistone chromosomal) protein isoforms and Y                                 | AF76039   | 204.38      | 235.32              | 0.002667  |
| 210517_s.at | kinase (PRK) anchor protein (granin) 12                                                             | AB003476  | 8.33        | 440.9               | 0.000347  |
| 210543_s.at | protein kinase, DNA-activated, catalytic subunit                                                    | U34994    | 2.77        | 343.79              | 0.000023  |
| 210582_s.at | protein kinase, DNA-activated, catalytic subunit                                                    | AF008299  | 2.79        | 149.35              | 0.001385  |
| 210649_s.at | SMV/SNF related, matrix associated, actin dependent, esolator of chromatin, subfamily 1, member 1   | AF231056  | 4.09        | 21.805              | 0.000002  |
| 210663_s.at | lysine 3-monoxygenase/hydroxylase 5-monoxygenase activation protein, avian polyprotein              | BC000879  | 3.65        | 313.56              | 0.009627  |
| 210784_x.at | hepatocyte immunoglobulin-like receptor, subfamily B (with TM and ITM domain), member 1             | AF009634  | 3.3         | 240.95              | 0.000031  |
| 210935_s.at | gpcr272954.1 / DHE-Hemo sapiens PNAS-29 mRNA, complete cds. / FEA-mRNA / TRD-PNAS-29 / D            | AF274934  | 3.92        | 185.41              | 0.000065  |
| 210978_s.at | transcript 2, rat receptor-bound protein 10                                                         | BC006471  | 2.35        | 32.29               | 0.000117  |
| 211071_s.at | ALL1 related gene from chromosome 14                                                                | BC006471  | 2.58        | 354.23              | 0.000346  |
| 211135_x.at | hepatocyte immunoglobulin-like receptor, subfamily B (with TM and ITM domain), member 3             | AF009644  | 3.92        | 272.98              | 0.000018  |
| 211136_s.at | clp1, lip and palte associated transmembrane protein 1                                              | BC004865  | 2.3         | 203.51              | 0.002775  |
| 211162_x.at | stereocilia desaturase (delta 5-desaturase)                                                         | AF118616  | 2.95        | 262.61              | 0.000417  |
| 211164_s.at | stereocilia desaturase (delta 5-desaturase)                                                         | AF024400  | 2.91        | 120.17              | 0.000031  |
| 211182_x.at | hepatocyte immunoglobulin-like receptor, subfamily B (with TM and ITM domain), member 1             | AF000424  | 2.08        | 113.67              | 0.000455  |
| 211600_at   | protein tyrosine phosphatase, receptor type, O                                                      | U20489    | 2.12        | 1204.89             | 0.000007  |
| 211653_x.at | tdp43/3376.1 / DHE-Human pseudo-chloridrase reductase mRNA, complete cds. / FEA-mRNA / D/B          | XR43376   | 9.14        | 1514.24             | 0.001456  |
| 211769_x.at | carboxypeptidase Y                                                                                  | BC006088  | 2.19        | 273.28              | 0.001047  |
| 211855_s.at | carboxypeptidase Y                                                                                  | AU174946  | 2.28        | 136.01              | 0.000068  |
| 212016_s.at | polyomavirus large binding protein (ependymoma nuclear ribonucleoprotein 1)                         | AA676988  | 4.79        | 238.55              | 0.000018  |
| 212073_at   | calcium kinase 2, alpha 1, polypeptide                                                              | AF631874  | 2.44        | 122.017             | 0.000017  |
| 212081_x.at | allograft inflammatory factor 1                                                                     | AF128756  | 2.51        | 247.84              | 0.000003  |
| 212092_at   | preferentially expressed 10                                                                         | BE55180   | 3.48        | 255.91              | 0.009685  |
| 212125_at   | hep G1Pase activating protein 1                                                                     | NM_012893 | 2.46        | 54.105              | 0.000059  |
| 212193_s.at | KIAA0231 protein                                                                                    | BE81529   | 3.09        | 289.44              | 0.000914  |
| 212218_s.at | F-box only protein 9                                                                                | AB54041   | 2.69        | 451.24              | 0.001253  |
| 212229_s.at | F-box only protein 21                                                                               | AC001699  | 2.51        | 111.48              | 0.000007  |
| 212251_at   | Consensus includes dbA972475 / FEA+ST / D/B. XRF+dbI5769391 / D/B. XRF+estW40D09.X1 / C/D           | AB972475  | 3.51        | 317.16              | 0.000005  |
| 212279_at   | hypoxanthine phosphoribosyl transferase                                                             | BE729865  | 2.72        | 152.99              | 0.000018  |
| 212388_at   | hypoxanthine phosphoribosyl transferase                                                             | AF057093  | 2.59        | 123.91              | 0.001926  |
| 212514_x.at | DEAD/H (Asp-Glu-Ala-Asp/His) box polypeptide 3                                                      | U83115    | 2.88        | -827.62             | 0.002899  |
| 212559_at   | protein kinase, cAMP-dependent, regulatory, type I, beta                                            | AU148827  | -2.96       | -151.61             | 0.006795  |
| 212582_at   | KIAA1451 protein                                                                                    | AU149473  | 3.49        | 188.39              | 0.000002  |
| 212648_at   | hypoxanthine phosphoribosyl transferase                                                             | AF024400  | 2.72        | 120.17              | 0.000031  |
| 212906_at   | Consensus includes dbI044440 / FEA+EST / D/B. XRF+gl381493 / D/B. XRF+estW40D09.X1 / C/D            | BC044440  | 5.72        | 380.4               | 0.000105  |
| 213048_s.at | SEI Translocation (myeloid leukemia-associated)                                                     | W65693    | 2.83        | 92.58               | 0.000001  |
| 213350_at   | ribosomal protein S11                                                                               | BE60255   | 3.48        | 599.97              | 0.009181  |
| 213446_s.at | UQ motif containing GTPase activating protein 1                                                     | AF679073  | 2.85        | 110.9               | 0.00002   |
| 213605_s.at | hypoxanthine phosphoribosyl transferase                                                             | AF024400  | 2.81        | 164.42              | 0.000927  |
| 213720_s.at | SMV/SNF related, matrix associated, actin dependent, esolator of chromatin, subfamily A, member 4   | AB81675   | -2.31       | -551.84             | 0.000385  |
| 213729_at   | formin-binding protein 3                                                                            | Z78308    | 2.12        | 266.72              | 0.000417  |
| 213872_s.at | hypoxanthine phosphoribosyl transferase                                                             | BC000340  | 2.03        | 110.37              | 0.000017  |
| 213885_s.at | Consensus includes dbA101156 / FEA+ST / D/B. XRF+gl4989056 / D/B. XRF+estW40D09.X1 / C/D            | AF101156  | 7.57        | 464.4               | 0.000003  |
| 213886_s.at | Consensus includes dbA101156 / FEA+ST / D/B. XRF+gl4989056 / D/B. XRF+estW40D09.X1 / C/D            | AF101156  | 7.57        | 464.4               | 0.000003  |
| 214007_s.at | protein tyrosine kinase 9                                                                           | AA665024  | 5.89        | 159.34              | 0.000089  |
| 214030_at   | hypoxanthine phosphoribosyl transferase                                                             | BE501352  | -2.15       | -260.32             | 0.009523  |
| 214041_x.at | ribosomal protein L37a                                                                              | BE57772   | 2.78        | 268.95              | 0.004062  |
| 214091_s.at | glutathione peroxidase 3 (glutath)                                                                  | AW149846  | 2.29        | 141.73              | 0.001607  |
| 214114_x.at | KIAA1198 protein 1A (I24D)                                                                          | AF024400  | -2.98       | -120.91             | 0.000927  |
| 214213_x.at | lamin A/C                                                                                           | AA061189  | 2.81        | 230.23              | 0.000243  |
| 214305_s.at | splicing factor 3b, subunit 1, 1550                                                                 | AW003030  | 3.32        | 165.95              | 0.000002  |
| 214463_x.at | H4 histone family, member D                                                                         | NM_003541 | -2.86       | -195.68             | 0.000897  |
| 214543_x.at | homology of mouse quaking QKI (KH domain RNA binding protein)                                       | AF142421  | 2.76        | 118.14              | 0.000023  |
| 214612_x.at | methionine adenosyl transferase                                                                     | U108345   | 2.18        | 89.24               | 0.001919  |
| 214728_x.at | SMV/SNF related, matrix associated, actin dependent, esolator of chromatin, subfamily A, member 4   | AC026573  | -2.43       | -844.68             | 0.001705  |
| 214791_at   | Consensus includes dbA023116.1 / DHE-Homo sapiens cDNA FLJ3054.flc clone NTFR300152.2               | AF257659  | -2.98       | -169.87             | 0.000161  |
| 214845_s.at | calpainin                                                                                           | 576771    | 2.09        | 223.42              | 0.000247  |
| 214911_s.at | homodomain-containing 2                                                                             | 576771    | 2.09        | 299.15              | 0.000777  |



| probe set   | gene                                                                                                                  | Accession | fold change | difference of means | P value  |
|-------------|-----------------------------------------------------------------------------------------------------------------------|-----------|-------------|---------------------|----------|
| 214941_s.at | form-binding protein 3                                                                                                | AA675900  | 2.57        | 1.5451              | 0.000027 |
| 215052_at   | KIAA0316 gene product                                                                                                 | AA929767  | 2.99        | 217.09              | 0.00002  |
| 215072_x.at | Consensus includes gb:AF59847/FEA-EST/DB_XREF=gb:11981235/DB_XREF=gb:601852205/1                                      | BR958447  | 2.65        | 270.58              | 0.000031 |
| 215256_s.at | protoporphyrin-binding protein assembly protein                                                                       | AA929767  | 2.42        | 199.93              | 0.000028 |
| 215278_at   | Consensus includes gb:AF52090/DB_XREF=hom sapiens clone 239530 mRNA sequence./FEA-mRNA/AA72117                        | AA72117   | 5.12        | 113.71              | 0.000281 |
| 215420_at   | Indian Hedgehog homolog (Drosophila)                                                                                  | AF526990  | -2.35       | -220.99             | 0.000786 |
| 215434_x.at | hypothetical protein FLJ20719                                                                                         | BE691172  | 2.75        | 1173.32             | 0.00005  |
| 215714_s.at | Consensus includes gb:AF25482/DB-Homo sapiens SMART4 domain (SMART4) genes complete                                   | AF25482   | 13.37       | 314.21              | 0.000003 |
| 215743_s.at | Consensus includes gb:AF25328/DB-Human DNA sequences from PAC clone 30P20 on chromosome Xq21.1                        | AF25328   | -2.38       | -463.54             | 0.002253 |
| 215794_s.at | Consensus includes gb:AF52543/DB-Homo sapiens cDNA FLJ19138 clone C00024/FEA-mRNA/AA70544                             | AA70544   | 2.01        | 118.62              | 0.000774 |
| 215826_x.at | Consensus includes gb:AK03017/DB-Homo sapiens cDNA FLJ2935 fs. clone NTZRP2005496.                                    | AK03017   | 2.73        | 553.43              | 0.000089 |
| 216060_s.at | KIAA0666 protein                                                                                                      | AK021890  | -3.37       | -395.55             | 0.000149 |
| 216239_s.at | PTH-responsive osteocalcin B1 protein                                                                                 | U97408    | -4.06       | -230                | 0.003357 |
| 216347_s.at | protein phosphatase 1, regulatory (inhibitor) subunit 3B                                                              | AK023188  | -2.51       | -155.03             | 0.001544 |
| 216468_x.at | KIAA0316 protein                                                                                                      | AK023188  | 2.51        | 155.03              | 0.001544 |
| 216508_x.at | high-mobility group (enhancers chromosomal) protein 1                                                                 | AC002277  | 2.11        | 108.72              | 0.000712 |
| 216534_s.at | enolase 1 (alpha)                                                                                                     | U89968    | 2.02        | 293.76              | 0.000528 |
| 216591_s.at | succinate dehydrogenase complex, subunit C, integral membrane protein, 13SD                                           | AF080579  | 3.23        | 159.07              | 0.000009 |
| 216594_x.at | ribonucleo reductase family 1, member C1 (dehydroxy dehydrogenase 1; 20-alpha (3-omega) hydroxysteroid C-17-20-lyase) | SS6290    | 8.28        | 1604.49             | 0.000295 |
| 216660_at   | Consensus includes gb:AA73172/FEA-EST/DB_XREF=gb:274531/DB_XREF=est:Z87702.s1/CLD/AA73172                             | AA73172   | -6.73       | -246.72             | 0.000172 |
| 216971_s.at | pectate lyase (EC 3.2.1.49)                                                                                           | AF025454  | 2.42        | 126.72              | 0.000172 |
| 216981_x.at | spectin 1, intermediate filament binding protein, 500D                                                                | Z5367     | 1.5566      | 156.7               | 0.000397 |
| 217234_s.at | salpelin (gq4.115, leukoselin, C043)                                                                                  | AF199015  | 2.36        | 242.41              | 0.003976 |
| 217294_s.at | enolase 1 (beta)                                                                                                      | U89968    | 4.45        | 316.57              | 0.00015  |
| 217298_x.at | ribon derived from H13.16) redundant histone core                                                                     | U89968    | 3.59        | 1628.47             | 0.000018 |
| 217299_x.at | Consensus includes gb:AF574933/FEA-EST/DB_XREF=gb:246472/DB_XREF=est:UH-BL0-ubcd                                      | AF574933  | 2.98        | 283.02              | 0.000189 |
| 217549_at   | carbamoyl-phosphate synthetase 1, mitochondrial                                                                       | AA0524933 | 3.62        | 333.59              | 0.000031 |
| 217607_x.at | Consensus includes gb:AA73172/FEA-EST/DB_XREF=gb:274531/DB_XREF=est:Z87702.s1/CLD/AA73172                             | AA73172   | 1016.91     | 352.33              | 0.004896 |
| 217635_s.at | Consensus includes gb:AA769006/FEA-EST/DB_XREF=gb:2820244/DB_XREF=est:CR010.S1/CLD/AA769006                           | AA769006  | 21.95       | 175.85              | 0.000801 |
| 217693_s.at | KAB31, member RAS oncogene family                                                                                     | NM_008588 | 3.08        | 100.23              | 0.000088 |
| 217699_s.at | pectatein homolog-like domain, family A, member 1                                                                     | NM_007350 | 2.17        | 135.93              | 0.001335 |
| 218094_s.at | uncharacterized hypothetical protein HSNAP1                                                                           | NM_018478 | 2.12        | 176.55              | 0.000493 |
| 218139_s.at | hypothetical protein FLJ10813                                                                                         | NM_018279 | 3.18        | 449.74              | 0.000735 |
| 218237_s.at | amino acid transporter system A1                                                                                      | NM_030674 | -2.25       | -264.13             | 0.007351 |
| 218273_s.at | prostate dehydrogenase phosphatase                                                                                    | NM_018644 | 2.33        | 123.21              | 0.004433 |
| 218356_at   | F5d homolog 2 (F5d)                                                                                                   | NM_013339 | -2.38       | -572.49             | 0.00386  |
| 218801_at   | hypothetical protein FLJ20654                                                                                         | NM_017920 | -2.09       | -265.19             | 0.002176 |
| 218831_at   | hypothetical protein PF5395                                                                                           | NM_021732 | 2.32        | 308.06              | 0.002784 |
| 218859_at   | KIAA1685 protein                                                                                                      | NM_018265 | 2.64        | 238.9               | 0.000103 |
| 218871_s.at | hypothetical protein FLJ22715                                                                                         | NM_022894 | -2.52       | -402.32             | 0.000127 |
| 218943_s.at | RNA helicase                                                                                                          | NM_014514 | 3.64        | -211.42             | 0.000023 |
| 219147_s.at | hypothetical protein FLJ20559                                                                                         | NM_017681 | -2.39       | -207.52             | 0.000963 |
| 219148_at   | PDZ-binding kinase, T-cell oncogene protein kinase                                                                    | NM_018492 | 2.25        | 184.1               | 0.000655 |
| 219209_at   | melanoma differentiation associated protein 5                                                                         | NM_022168 | -3.13       | -179.09             | 0.001273 |
| 219349_at   | core 1 UDP-galactose-4-epimerase/alpha-D-beta 1,3-galactosyltransferase                                               | NM_022156 | -3.36       | -560.59             | 0.000855 |
| 219664_s.at | 2'-deoxyribose 5-phosphate-dependent proteinase                                                                       | NM_020664 | -2.03       | -353.04             | 0.000311 |
| 219805_at   | hypothetical protein FLJ22965                                                                                         | NM_022101 | 2.74        | 138.3               | 0.001237 |
| 219826_at   | hypothetical protein FLJ23233                                                                                         | NM_024691 | -2.25       | -179.02             | 0.002053 |
| 219944_at   | hypothetical protein FLJ20284                                                                                         | NM_017244 | 3.14        | 162.92              | 0.000005 |
| 220104_at   | hypothetical protein FLJ26421                                                                                         | NM_020119 | -2.75       | -142.34             | 0.000541 |
| 220189_s.at | memoxy (alpha-1,3)-glycosyltransferase, isoenzyme B                                                                   | NM_014275 | 2.78        | 386.34              | 0.000111 |
| 220204_s.at | hypothetical protein FLJ14351                                                                                         | NM_014275 | 2.78        | 386.34              | 0.000111 |
| 220240_s.at | hypothetical protein FLJ20523                                                                                         | NM_017905 | 2.19        | 313.84              | 0.000305 |
| 220293_x.at | hypothetical protein FLJ20354                                                                                         | NM_017729 | 4.56        | 105.53              | 0.000019 |
| 220392_s.at | HSP70L protein                                                                                                        | NM_017729 | 2.76        | 105.53              | 0.000019 |
| 221039_s.at | development and differentiation enhancing factor 1                                                                    | NM_018482 | 2.88        | 139.16              | 0.000884 |
| 221369_at   | metaborn receptor 1A                                                                                                  | NM_005958 | 3.81        | 108.32              | 0.000011 |
| 221423_s.at | hypothetical protein AF140225                                                                                         | NM_030799 | 2.01        | 102.81              | 0.000454 |
| 221473_x.at | transmembrane protein 19                                                                                              | U99188    | 2.34        | 291.97              | 0.000454 |
| 221829_s.at | synaptotagmin I, includes db:AK036008/1/DB-Homo sapiens cDNA FLJ23255 fs. clone RH016344/FEA-mRNA/AA07759             | AA07759   | 2.09        | 132.75              | 0.000002 |
| 221829_s.at | synaptotagmin I, includes db:AK036008/2/DB-Homo sapiens cDNA FLJ23255 fs. clone RH016344/FEA-mRNA/AA07759             | AA07759   | 2.88        | 348.98              | 0.000047 |
| 222204_s.at | DIZ2/PS66/104 protein                                                                                                 | AI_10238  | -2.26       | -163.93             | 0.000532 |
